# Supplementary material for: Regulatory and sequence evolution in response to selection for improved associative learning ability in Nasonia vitripennis
Source: BMC Genomics. 2018 Dec 10;19:892. doi: 10.1186/s12864-018-5310-9 (PMC6288879; doi:10.1186/s12864-018-5310-9)
Supplement: Supplementary file 3 — Table S2. Allele frequencies of the 118 significantly diverged SNPs in the selection and control lines. (XLSX 19 kb) [file 12864_2018_5310_MOESM3_ESM.xlsx]

## Sheet: allele_freq
genomic_location	selected_A	control_A	selected_B	control_B	selected_C	control_C	seleted_D	control_D
NC_015867.2_1210829	0.653061	0.982143	0.380952	0.891892	0.692308	0.913043	0.60396	0.93617
NC_015867.2_2087696	0.371795	0.88	0.454545	0.815789	0.647059	0.64	0.443396	0.873418
NC_015867.2_2091940	0.416667	0.833333	0.235294	0.916667	0.444444	0.631579	0.454545	0.892308
NC_015867.2_2097098	0.333333	0.74359	0.368421	0.896552	0.3125	0.8	0.471154	0.884615
NC_015867.2_2099401	0.341463	0.688889	0.32	0.818182	0.411765	0.615385	0.368421	0.851064
NC_015867.2_2109815	0.444444	0.804348	0.461538	0.96	0.375	0.833333	0.474359	0.881579
NC_015867.2_2127609	0.509434	0.74359	0.37931	0.885714	0.631579	0.71875	0.5	0.881579
NC_015867.2_2131766	0.392157	0.790698	0.419355	0.913043	0.541667	0.851852	0.531746	0.93617
NC_015867.2_2136643	0.517857	0.8	0.375	0.911765	0.6	0.727273	0.45	0.917647
NC_015867.2_2139773	0.4	0.786885	0.517241	0.861111	0.4	0.689655	0.427632	0.88764
NC_015867.2_2139790	0.416667	0.793103	0.538462	0.823529	0.368421	0.709677	0.459677	0.922222
NC_015867.2_2140191	0.386667	0.811594	0.285714	0.780488	0.34375	0.791667	0.468468	0.905263
NC_015867.2_2140941	0.433333	0.803279	0.347826	0.857143	0.451613	0.608696	0.494118	0.884615
NC_015867.2_2143335	0.375	0.813953	0.565217	0.90625	0.5	0.655172	0.43956	0.890909
NC_015867.2_2144911	0.303571	0.75	0.4	0.864865	0.416667	0.75	0.447368	0.888889
NC_015867.2_2152734	0.344262	0.790323	0.56	0.9375	0.473684	0.777778	0.494253	0.91
NC_015867.2_2167682	0.354167	0.807692	0.538462	0.880952	0.434783	0.789474	0.467742	0.957447
NC_015867.2_2168510	0.346667	0.642857	0.457143	0.878049	0.3125	0.692308	0.396396	0.857143
NC_015867.2_2182546	0.297872	0.728814	0.304348	0.783784	0.347826	0.6	0.358696	0.845238
NC_015867.2_2189314	0.461538	0.78	0.55	0.913043	0.529412	0.68	0.505747	0.901408
NC_015867.2_2213188	0.347826	0.851064	0.571429	0.928571	0.5	0.809524	0.517241	0.932584
NC_015867.2_2213578	0.36	0.869565	0.333333	0.820513	0.625	0.789474	0.472727	0.9
NC_015867.2_2219474	0.622951	0.148148	0.548387	0.125	0.592593	0.3125	0.604167	0.0875
NC_015867.2_2273946	0.52459	0.175439	0.52	0.105263	0.363636	0.333333	0.435484	0.134615
NC_015867.2_2301786	0.5	0.162791	0.529412	0.122449	0.516129	0.238095	0.445455	0.130435
NC_015867.2_4685360	0.53125	0.795455	0.647059	0.896552	0.461538	0.833333	0.485149	0.904762
NC_015867.2_5974874	0.492537	0.775862	0.521739	0.953488	0.666667	0.695652	0.468468	0.852632
NC_015867.2_6019016	0.540984	0.809524	0.571429	1	0.535714	0.75	0.443548	0.796117
NC_015867.2_6096556	0.533333	0.829787	0.529412	0.888889	0.444444	0.736842	0.511364	0.891892
NC_015867.2_6127543	0.470588	0.875	0.68	0.740741	0.466667	0.928571	0.460177	0.84058
NC_015867.2_6127865	0.477273	0.833333	0.588235	0.933333	0.619048	0.75	0.438776	0.944444
NC_015867.2_6131063	0.520833	0.8	0.5	0.916667	0.357143	0.736842	0.421053	0.871429
NC_015867.2_6131312	0.527273	0.767442	0.555556	0.909091	0.545455	0.611111	0.492424	0.897727
NC_015867.2_6152178	0.488372	0.888889	0.533333	0.966667	0.6	0.888889	0.371429	0.808989
NC_015867.2_6152494	0.418605	0.777778	0.4375	0.857143	0.421053	0.789474	0.350515	0.83908
NC_015867.2_6161063	0.465116	0.833333	0.391304	0.969697	0.521739	0.833333	0.52	0.942308
NC_015867.2_6161574	0.530612	0.848485	0.583333	0.967742	0.294118	0.875	0.4625	0.95
NC_015867.2_6215773	0.509804	0.794872	0.578947	0.956522	0.363636	0.666667	0.463918	0.933333
NC_015867.2_6216186	0.414634	0.803922	0.6875	0.869565	0.4	0.809524	0.421875	0.918033
NC_015867.2_6251298	0.451613	0.763158	0.583333	0.814815	0.333333	0.722222	0.452632	0.898305
NC_015867.2_6259108	0.431373	0.76087	0.555556	0.911765	0.545455	0.736842	0.483051	0.905882
NC_015867.2_6266016	0.431373	0.882353	0.52381	0.923077	0.333333	0.851852	0.423913	0.954545
NC_015867.2_6346643	0.355556	0.847826	0.62069	0.892857	0.346154	0.72	0.368	0.873684
NC_015867.2_6361442	0.487179	0.814815	0.5	0.913043	0.409091	0.777778	0.34375	0.940299
NC_015867.2_6365329	0.413043	0.846154	0.56	0.851852	0.5	0.692308	0.433333	0.894737
NC_015867.2_6382088	0.511628	0.863636	0.5	0.807692	0.458333	0.615385	0.460784	0.872093
NW_001814903.1_49500	0.739683	0.542714	0.688406	0.487805	0.689076	0.592593	0.711621	0.564039
NW_001814903.1_60929	0.572755	0.394286	0.56391	0.339806	0.53211	0.290323	0.526316	0.411585
NC_015868.2_241651	0.297872	0.618182	0.266667	0.55	0.333333	0.5	0.229358	0.648649
NC_015868.2_784747	0.037037	0.454545	0.0740741	0.447368	0.227273	0.5625	0.106061	0.373333
NC_015868.2_789212	0.162162	0.5	0.1875	0.53125	0.363636	0.428571	0.0769231	0.493671
NC_015868.2_795235	0.136364	0.475	0.0416667	0.342857	0.0869565	0.47619	0.0375	0.444444
NC_015868.2_999510	0	0.409091	0.08	0.441176	0.0833333	0.375	0	0.289157
NC_015868.2_1224356	1	0.625	0.928571	0.575758	0.925926	0.653846	1	0.744898
NC_015868.2_1234384	1	0.626667	0.9	0.6	1	0.645161	1	0.747748
NC_015868.2_1276228	1	0.65	1	0.470588	0.952381	0.5	1	0.651163
NC_015868.2_1333356	0.827586	0.321429	0.73913	0.142857	0.785714	0.4	0.925234	0.344828
NC_015868.2_2083323	0.951613	0.6	0.833333	0.418605	0.818182	0.566667	0.837838	0.556452
NC_015868.2_2100773	0.0923077	0.387755	0.0526316	0.421053	0.153846	0.470588	0.137097	0.445545
NC_015868.2_6947360	0.648148	0.28	0.62069	0.166667	0.5	0.409091	0.544944	0.192771
NC_015868.2_18266010	0.480769	0.914894	0.653846	0.76	0.545455	0.857143	0.469565	0.846154
NC_015868.2_18266115	0.520833	0.866667	0.65	0.853659	0.666667	0.939394	0.424242	0.845238
NC_015868.2_18925551	0.569231	0.961538	0.631579	0.926829	0.833333	0.944444	0.552083	0.833333
NC_015868.2_19410860	0.367347	0.772727	0.571429	0.757576	0.478261	0.588235	0.361111	0.792683
NC_015868.2_25269087	0.926829	0.5	0.631579	0.36	0.75	0.538462	0.803738	0.455556
NC_015869.2_955460	0.909091	0.421053	0.826087	0.558824	0.833333	0.363636	0.945652	0.584158
NC_015869.2_4091212	0.923077	0.704545	0.85	0.605263	1	0.55	0.935714	0.542169
NC_015869.2_4810293	0.0491803	0.365385	0.2	0.302326	0.1	0.48	0.11194	0.454545
NC_015869.2_5231657	0.745455	0.24359	0.565217	0.333333	0.545455	0.28125	0.733945	0.285714
NC_015869.2_5510697	0.892857	0.44898	0.724138	0.421053	0.642857	0.583333	0.833333	0.47619
NC_015869.2_5510706	0.892857	0.469388	0.7	0.473684	0.615385	0.625	0.81203	0.461538
NC_015869.2_5515232	0.108696	0.536585	0.0769231	0.444444	0.25	0.47619	0.104762	0.663265
NC_015869.2_5520225	0.188679	0.59322	0.466667	0.606061	0.357143	0.791667	0.26087	0.605263
NC_015869.2_7630890	0.403226	0.777778	0.652174	0.851064	0.266667	0.565217	0.425926	0.71
NC_015869.2_10304960	0.6875	0.397059	0.666667	0.432432	0.727273	0.212121	0.720339	0.444444
NC_015869.2_10547245	0.759259	0.3125	0.5	0.433333	0.6875	0.15	0.621053	0.290698
NC_015869.2_15827018	0.333333	0.714286	0.310345	0.761905	0.3	1	0.418367	0.809524
NC_015869.2_15833423	0.160714	0.527273	0.166667	0.53125	0.176471	0.65625	0.184466	0.783133
NC_015869.2_16604402	0.585366	0.170732	0.772727	0.363636	0.642857	0.142857	0.712963	0.16
NC_015869.2_16627258	0.225806	0.658537	0.272727	0.485714	0	0.47619	0.216495	0.568966
NC_015869.2_16663578	0.978723	0.666667	0.870968	0.7	1	0.772727	0.985075	0.616279
NC_015869.2_16695333	0.923077	0.68	0.913043	0.612903	1	0.8125	0.991228	0.621951
NC_015869.2_23296003	0.676471	0.313725	0.85	0.441176	0.75	0.333333	0.825243	0.375
NC_015869.2_23304009	0.705882	0.255814	0.846154	0.361111	0.7	0.423077	0.827586	0.43038
NC_015869.2_23304207	0.25	0.719298	0.0769231	0.558824	0.272727	0.541667	0.122642	0.550562
NW_001815547.1_11726	0.016129	0.363636	0	0.416667	0	0.384615	0.113821	0.297619
NW_001815547.1_132902	0.030303	0.326087	0.0952381	0.37931	0.0689655	0.4	0.12	0.367347
NW_001815547.1_132946	0.0434783	0.272727	0.037037	0.344828	0.037037	0.44	0.0964912	0.390805
NW_001815547.1_181915	0.95122	0.695652	0.909091	0.804878	1	0.714286	0.92517	0.701613
NW_001820504.1_7407	0.0972222	0.333333	0.142857	0.446809	0.0689655	0.435897	0.0990991	0.302326
NW_001818015.1_1293487	0.153846	0.591837	0.388889	0.8	0.190476	0.52381	0.25	0.57971
NW_001818015.1_1294030	0.24	0.5625	0.454545	0.692308	0.142857	0.516129	0.23622	0.525
NW_001818015.1_1294051	0.243243	0.511111	0.5	0.736842	0.24	0.464286	0.268519	0.620253
NW_001820749.1_1057571	0.296875	0.0638298	0.413793	0	0.371429	0	0.368421	0.0686275
NW_001820749.1_1080477	0.407407	0.693878	0.347826	0.71875	0.583333	0.818182	0.354331	0.717391
NW_001820749.1_1080514	0.37037	0.677419	0.434783	0.571429	0.421053	0.782609	0.4	0.761364
NW_001820749.1_2360183	0.4	0.2	0.40625	0	0.5	0.2	0.485437	0.126582
NW_001820749.1_2361497	0.487805	0.172414	0.363636	0	0.416667	0.15	0.439024	0.0519481
NW_001820749.1_2365892	0.47619	0.142857	0.318182	0	0.409091	0.1	0.43949	0.037037
NW_001820749.1_2392046	0.5	0.863636	0.55	1	0.470588	0.95	0.546512	0.973333
NW_001820749.1_2392048	0.486486	0.863636	0.55	1	0.470588	0.95	0.568182	0.961039
NW_001820749.1_2392058	0.5	0.840909	0.619048	1	0.5	0.904762	0.505263	0.950617
NW_001820749.1_2400308	0.454545	0.195652	0.375	0	0.545455	0.105263	0.420561	0.0736842
NW_001820749.1_2410041	0.56	0.136364	0.285714	0	0.481481	0.0588235	0.44898	0.027027
NW_001820749.1_2417890	0.44898	0.170213	0.214286	0	0.473684	0.181818	0.449153	0.0731707
NW_001820749.1_2419764	0.40625	0.153846	0.4375	0	0.545455	0.142857	0.475728	0.0618557
NW_001820749.1_2419804	0.381579	0.176471	0.478261	0	0.518519	0.114286	0.489796	0.0674157
NW_001820749.1_2419841	0.444444	0.212766	0.333333	0	0.583333	0.15625	0.414414	0.0777778
NW_001820749.1_2419848	0.430769	0.212766	0.272727	0	0.5	0.133333	0.443478	0.0842105
NW_001820749.1_2441112	0.612903	0.147541	0.40625	0	0.555556	0.151515	0.411348	0.0841121
NW_001820749.1_2446758	0.466667	0.235294	0.4375	0	0.428571	0.0833333	0.515152	0.0967742
NW_001820749.1_2449468	0.527027	0.113208	0.357143	0	0.666667	0.111111	0.483051	0.0568182
NC_015871.2_7747083	0.348837	0.577778	0.294118	0.551724	0.357143	0.736842	0.207207	0.619565
NW_001815126.1_1642288	0.466667	0.121212	0	0	0.461538	0	0.448718	0
NW_001815126.1_1733230	0.411765	0.0322581	0.125	0	0.294118	0	0.428571	0
NW_001815126.1_1842743	0.636364	0.952381	0.904762	1	0.653846	1	0.608333	1
NW_001817747.1_124335	0.737179	0.584746	0.651515	0.590361	0.717172	0.664122	0.763855	0.590099
NW_001815450.1_708	0.0142857	0.434211	0.128205	0.3	0	0.28125	0.0991736	0.33913
