# Supplementary material for: Regulatory and sequence evolution in response to selection for improved associative learning ability in Nasonia vitripennis
Source: BMC Genomics. 2018 Dec 10;19:892. doi: 10.1186/s12864-018-5310-9 (PMC6288879; doi:10.1186/s12864-018-5310-9)
Supplement: Supplementary file 4 — Table S3. Genes underlying consistently diverged SNPs. Included are genes carrying candidate SNPs in their gene bodies or in the regions 10 kb up- or downstream. (XLSX 93 kb) [file 12864_2018_5310_MOESM4_ESM.xlsx]

## Sheet: data
NCBI gene name	Gene ID	Position	Gene name	Gene description	Transcripts	Protein product IDs	Other gene names	Orthologs	Annotated GO terms	Predicted PFAM domains
actin related protein 1	Arp1	NC_015869.2:4074025-4109976:-	Actin. cytoplasmic 1	actin related protein 1	NM_001163719.1, NM_001163720.1, XM_008212052.1	NP_001157191.1, NP_001157192.1, XP_008210274.1	actin related protein 1, Act5C, Act42A, NV16613, Actin. cytoplasmic 1 , Arp1	AAEL011197 (Aedes aegypti), ACEP19149 (Atta cephlotes), Aqu1.229446 (Amphimedon queenslandica), Aqu1.229447 (Amphimedon queenslandica), ENSG00000075624 (Homo sapiens), ENSMUSG00000029580 (Mus musculus), FBgn0000042 (Drosophila melanogaster), FBgn0000043 (Drosophila melanogaster), GB17681 (Apis mellifera), SINV26467 (Solenopsis invicta), TC006296 (Tribolium castaneum), WBGene00000066 (Caenorhabdit…	reproductive process (GO:0022414), cytoplasm (GO:0005737), non-membrane-bounded organelle (GO:0043228), spermatid development (GO:0007286), biological_process (GO:0008150), single-organism cellular process (GO:0044763), multi-organism process (GO:0051704), transport (GO:0006810), sperm individualization (GO:0007291), multicellular organismal reproductive process (GO:0048609), reproduction (GO:000…	Actin (PF00022.14)
ATPase, Cu++ transporting, alpha polypeptide	Atp7a	NC_015869.2:16607334-16611286:+	copper-transporting ATPase 1		NM_001142388.1	NP_001135860.1	copper-transporting ATPase 1 , Atp7a		nucleoside metabolic process (GO:0009116), cellular metabolic process (GO:0044237), substrate-specific transmembrane transporter activity (GO:0022891), transition metal ion transport (GO:0000041), metabolic process (GO:0008152), purine nucleotide catabolic process (GO:0006195), catalytic activity (GO:0003824), purine ribonucleoside catabolic process (GO:0046130), ATPase activity, coupled to movem…	E1-E2 ATPase (PF00122.15), Heavy-metal-associated domain (PF00403.21), haloacid dehalogenase-like hydrolase (PF00702.21)
cytochrome P450 9AH6	CYP9AH6	NC_015867.2:6349261-6351229:+	Cytochrome P450	cytochrome P450 9AH6	XM_008215118.1, NM_001172542.1	XP_008213340.1, NP_001166013.1	CYP9AH6, NV18050, Cytochrome P450 , Cyp9f2, Cyp9b2, Cyp9b1, Cyp9c1, Cyp9h1, cytochrome P450 9AH6	AAEL001288 (Aedes aegypti), AAEL001292 (Aedes aegypti), AAEL001312 (Aedes aegypti), AAEL001320 (Aedes aegypti), AAEL001807 (Aedes aegypti), AAEL002633 (Aedes aegypti), AAEL002638 (Aedes aegypti), AAEL006784 (Aedes aegypti), AAEL006793 (Aedes aegypti), AAEL006795 (Aedes aegypti), AAEL006798 (Aedes aegypti), AAEL006802 (Aedes aegypti), AAEL006805 (Aedes aegypti), AAEL006811 (Aedes aegypti), AAEL006…	metabolic process (GO:0008152), monooxygenase activity (GO:0004497), biological_process (GO:0008150), oxidoreductase activity, acting on paired donors, with incorporation or reduction of molecular oxygen (GO:0016705), single-multicellular organism process (GO:0044707), intracellular part (GO:0044424), heterocyclic compound binding (GO:1901363), transition metal ion binding (GO:0046914), membrane …	Cytochrome P450 (PF00067.17)
dynactin subunit 2 (aka p50)	Dctn2	NC_015867.2:2175543-2178395:+	dynactin subunit 2. putative	dynactin subunit 2	NM_001190753.1	NP_001177682.1	Dctn2, dynactin subunit 2, dynactin subunit 2. putative , NV14013, Dmn	AAEL006029 (Aedes aegypti), AAEL011590 (Aedes aegypti), ACEP23716 (Atta cephlotes), Aqu1.227510 (Amphimedon queenslandica), BGIBMGA009875 (Bombyx mori), ENSG00000175203 (Homo sapiens), ENSMUSG00000025410 (Mus musculus), FBgn0021825 (Drosophila melanogaster), GB17710 (Apis mellifera), GB49158 (Apis mellifera), SINV16043 (Solenopsis invicta), TC001942 (Tribolium castaneum), WBGene00001018 (Caenorha…	cellular component biogenesis (GO:0044085), developmental maturation (GO:0021700), reproductive process (GO:0022414), segmentation (GO:0035282), cytoplasm (GO:0005737), non-membrane-bounded organelle (GO:0043228), hair cell differentiation (GO:0035315), epidermal cell differentiation (GO:0009913), epidermis development (GO:0008544), embryo development (GO:0009790), sensory organ morphogenesis (GO…	Dynamitin (PF04912.9)
isoleucyl-tRNA synthetase 2, mitochondrial	Iars2	NC_015867.2:6378173-6382740:-	Isoleucyl-tRNA synthetase. mitochondrial	isoleucyl-tRNA synthetase 2, mitochondrial, THO complex 4	NM_001129821.1	NP_001123293.1	CG5414, isoleucyl-tRNA synthetase 2, mitochondrial, THO complex 4, NV18052, THO complex subunit 4-A , Iars2, Thoc4, Iars2, Thoc4, Isoleucyl-tRNA synthetase. mitochondrial	AAEL009917 (Aedes aegypti), ACEP17639 (Atta cephlotes), Aqu1.218780 (Amphimedon queenslandica), BGIBMGA014150 (Bombyx mori), ENSG00000067704 (Homo sapiens), ENSMUSG00000026618 (Mus musculus), FBgn0036569 (Drosophila melanogaster), GB13728 (Apis mellifera), GB52676 (Apis mellifera), TC002282 (Tribolium castaneum), WBGene00002153 (Caenorhabditis elegans)	posttranscriptional regulation of gene expression (GO:0010608), cytoplasm (GO:0005737), cellular metabolic process (GO:0044237), metabolic process (GO:0008152), tRNA aminoacylation for protein translation (GO:0006418), aminoacyl-tRNA ligase activity (GO:0004812), biological_process (GO:0008150), regulation of primary metabolic process (GO:0080090), single-organism cellular process (GO:0044763), c…	Anticodon-binding domain of tRNA (PF08264.8), tRNA synthetases class I (I, L, M and V) (PF00133.17)
ligand-gated chloride channel homolog 3	LCCH3	NC_015869.2:23300398-23312030:+	Gamma-aminobutyric acid receptor subunit beta	ligand-gated chloride channel homolog 3	XM_008205080.1, NM_001247966.1	XP_008203302.1, NP_001234895.1	NV14245, ligand-gated chloride channel homolog 3, Lcch3, LCCH3, Gamma-aminobutyric acid receptor subunit beta	AAEL010710 (Aedes aegypti), ACEP20187 (Atta cephlotes), BGIBMGA007598 (Bombyx mori), ENSG00000163288 (Homo sapiens), ENSMUSG00000029212 (Mus musculus), FBgn0010240 (Drosophila melanogaster), GB12078 (Apis mellifera), GB45542 (Apis mellifera), SINV23390 (Solenopsis invicta), TC007145 (Tribolium castaneum), WBGene00001512 (Caenorhabditis elegans)	single organism signaling (GO:0044700), substrate-specific transmembrane transporter activity (GO:0022891), ion channel activity (GO:0005216), biological_process (GO:0008150), ligand-gated ion channel activity (GO:0015276), cellular response to stimulus (GO:0051716), ion transmembrane transporter activity (GO:0015075), single-organism cellular process (GO:0044763), plasma membrane (GO:0005886), t…	Neurotransmitter-gated ion-channel transmembrane region (PF02932.11), Neurotransmitter-gated ion-channel ligand binding domain (PF02931.18)
uncharacterized (aka OBP56)	LOC100114139	NW_001820749.1:2439494-2440240:-	LOC100114139	uncharacterized LOC100114139	XM_001606380.3	XP_001606430.1	LOC100114139, NV12717, OBP56, uncharacterized LOC100114139	WBGene00236808 (Caenorhabditis elegans)	binding (GO:0005488), odorant binding (GO:0005549), molecular_function (GO:0003674)	PBP/GOBP family (PF01395.17)
uncharacterized (aka OBP61)	LOC100114176	NW_001820749.1:2449306-2450294:-	LOC100114176	uncharacterized LOC100114176	XM_001606440.3	XP_001606490.1	OBP61, LOC100114176, uncharacterized LOC100114176, NV12721	Aqu1.209398 (Amphimedon queenslandica), TC007342 (Tribolium castaneum)	chemosensory behavior (GO:0007635), biological_process (GO:0008150), single-multicellular organism process (GO:0044707), response to organic substance (GO:0010033), single-organism process (GO:0044699), extracellular region (GO:0005576), cellular_component (GO:0005575), extracellular space (GO:0005615), response to pheromone (GO:0019236), extracellular region part (GO:0044421), neurological syste…	PBP/GOBP family (PF01395.17)
uncharacterized (aka OBP60)	LOC100114222	NW_001820749.1:2448147-2449275:-	OBP60	uncharacterized LOC100114222	XM_001606428.3	XP_001606478.1	NV12720, uncharacterized LOC100114222, OBP60, LOC100114222	ENSG00000125246 (Homo sapiens)	chemosensory behavior (GO:0007635), biological_process (GO:0008150), single-multicellular organism process (GO:0044707), response to organic substance (GO:0010033), single-organism process (GO:0044699), extracellular region (GO:0005576), cellular_component (GO:0005575), response to pheromone (GO:0019236), neurological system process (GO:0050877), behavior (GO:0007610), binding (GO:0005488), olfac…	PBP/GOBP family (PF01395.17)
actin-binding protein IPP	LOC100114264	NC_015868.2:795845-802600:-	Actin-binding protein IPP	kelch-like protein 17-like	XM_008219525.1	XP_008217747.1	CG9426, Actin-binding protein IPP , kelch-like protein 17-like, LOC100114264, NV19037	AAEL003701 (Aedes aegypti), ACEP27669 (Atta cephlotes), BGIBMGA006864 (Bombyx mori), FBgn0032485 (Drosophila melanogaster), GB19993 (Apis mellifera), GB53654 (Apis mellifera), SINV12880 (Solenopsis invicta), TC012628 (Tribolium castaneum)	cytoplasm (GO:0005737), negative regulation of intracellular protein transport (GO:0090317), cytoskeletal protein binding (GO:0008092), negative regulation of protein localization to nucleus (GO:1900181), biological_process (GO:0008150), cytoplasmic sequestering of protein (GO:0051220), negative regulation of transport (GO:0051051), single-organism cellular process (GO:0044763), regulation of pro…	BTB And C-terminal Kelch (PF07707.10), Kelch motif (PF01344.20), BTB/POZ domain (PF00651.26)
prickle-like protein 3	LOC100114387	NC_015869.2:10166489-10322327:-	Prickle protein	uncharacterized LOC100114387	XM_008216031.1, XM_008216030.1, XM_008216032.1, XM_008216024.1, XM_008216029.1, XM_008216035.1, XM_008216026.1, XM_008216036.1, XM_008216028.1, XM_008216033.1, XM_008216025.1, XM_008216034.1, XM_008216027.1, XM_008216038.1, XM_008216037.1	XP_008214253.1, XP_008214252.1, XP_008214254.1, XP_008214246.1, XP_008214251.1, XP_008214257.1, XP_008214248.1, XP_008214258.1, XP_008214250.1, XP_008214255.1, XP_008214247.1, XP_008214256.1, XP_008214249.1, XP_008214260.1, XP_008214259.1	Prickle protein , Prickle. protein , LOC100114387, esn, pk, NV17517, uncharacterized LOC100114387	AAEL006891 (Aedes aegypti), ACEP24901 (Atta cephlotes), Aqu1.217773 (Amphimedon queenslandica), BGIBMGA012622 (Bombyx mori), ENSG00000163637 (Homo sapiens), ENSMUSG00000030020 (Mus musculus), FBgn0003090 (Drosophila melanogaster), FBgn0263934 (Drosophila melanogaster), GB18513 (Apis mellifera), GB44796 (Apis mellifera), SINV10190 (Solenopsis invicta), TC009830 (Tribolium castaneum), WBGene0002272…	imaginal disc-derived appendage morphogenesis (GO:0035114), cytoplasm (GO:0005737), hair cell differentiation (GO:0035315), epidermal cell differentiation (GO:0009913), epidermis development (GO:0008544), sensory organ morphogenesis (GO:0090596), biological_process (GO:0008150), skin development (GO:0043588), imaginal disc morphogenesis (GO:0007560), generation of neurons (GO:0048699), eye morpho…	LIM domain (PF00412.17), PET Domain (PF06297.9)
phosphatase and actin regulator 2	LOC100115228	NC_015868.2:916135-1070311:-	LOC100115228		XM_008211137.1, XM_008211133.1, XM_008211132.1, XM_008211136.1, XM_008211139.1, XM_008211138.1, XM_008211134.1, XM_008211135.1	XP_008209359.1, XP_008209355.1, XP_008209354.1, XP_008209358.1, XP_008209361.1, XP_008209360.1, XP_008209356.1, XP_008209357.1	LOC100115228		binding (GO:0005488), molecular_function (GO:0003674)	RPEL repeat (PF02755.10)
transcription elongation factor SPT5-like	LOC100115818	NC_015869.2:10472911-10549030:+	Transcription elongation factor SPT5	transcription elongation factor SPT5-like	XM_001600387.3	XP_001600437.1	Transcription elongation factor SPT5 , LOC100115818, NV17536, Spt5, transcription elongation factor SPT5-like	AAEL012259 (Aedes aegypti), Aqu1.226440 (Amphimedon queenslandica), FBgn0040273 (Drosophila melanogaster), TC015626 (Tribolium castaneum), WBGene00005015 (Caenorhabditis elegans)	polytene chromosome puff (GO:0005703), nucleic acid-templated transcription (GO:0097659), positive regulation of biosynthetic process (GO:0009891), cellular metabolic process (GO:0044237), regulation of cell cycle process (GO:0010564), non-membrane-bounded organelle (GO:0043228), nucleoplasm (GO:0005654), metabolic process (GO:0008152), intracellular (GO:0005622), binding (GO:0005488), regulation…	Spt5 transcription elongation factor, acidic N-terminal (PF11942.3), Early transcription elongation factor of RNA pol II, NGN section (PF03439.8), KOW motif (PF00467.24)
cys-loop ligand-gated ion channel subunit 8916	LOC100116271	NC_015869.2:23277539-23296622:-	Gamma-aminobutyric acid receptor alpha	cys-loop ligand-gated ion channel subunit 8916	XM_008205178.1	XP_008203400.1	Gamma-aminobutyric acid receptor alpha , cys-loop ligand-gated ion channel subunit 8916, CG8916, LOC100116271, NV14244, Nvit_8916	ACEP20189 (Atta cephlotes), BGIBMGA000891 (Bombyx mori), FBgn0030707 (Drosophila melanogaster), GB10798 (Apis mellifera), GB45548 (Apis mellifera), SINV23394 (Solenopsis invicta), TC008334 (Tribolium castaneum), WBGene00008551 (Caenorhabditis elegans)	single organism signaling (GO:0044700), substrate-specific transmembrane transporter activity (GO:0022891), ion channel activity (GO:0005216), biological_process (GO:0008150), ligand-gated ion channel activity (GO:0015276), cellular response to stimulus (GO:0051716), ion transmembrane transporter activity (GO:0015075), single-organism cellular process (GO:0044763), plasma membrane (GO:0005886), t…	Neurotransmitter-gated ion-channel transmembrane region (PF02932.11), Neurotransmitter-gated ion-channel ligand binding domain (PF02931.18)
uncharacterized LOC100116309	LOC100116309	NC_015867.2:2148302-2150163:+	LOC100116309	uncharacterized LOC100116309	XM_001607075.3	XP_001607125.1	uncharacterized LOC100116309, NV14005, LOC100116309	AAEL007744 (Aedes aegypti), BGIBMGA011315 (Bombyx mori), ENSG00000135974 (Homo sapiens), ENSMUSG00000010290 (Mus musculus), SINV12642 (Solenopsis invicta)	embryo development (GO:0009790), embryonic morphogenesis (GO:0048598), biological_process (GO:0008150), single-multicellular organism process (GO:0044707), intracellular part (GO:0044424), anatomical structure morphogenesis (GO:0009653), single-organism process (GO:0044699), cellular_component (GO:0005575), intracellular (GO:0005622), multicellular organismal process (GO:0032501), protein complex…	Developmental protein (PF15323.1)
histone H4	LOC100116387	NC_015867.2:2164553-2164947:-	Histone H4	histone H4-like, histone H4 replacement	XM_001607149.2	XP_001607199.1	NV14007, Histone H4 , LOC100113706, LOC100114096, LOC100114134, LOC100114289, LOC100114321, His4r, LOC100114495, LOC100114607, LOC100115787, LOC100115907, LOC100116387, LOC100116453, LOC100117301, LOC100117327, LOC100118036, LOC100118072, LOC100116387, histone H4-like, histone H4 replacement	AAEL011999 (Aedes aegypti), ACEP26443 (Atta cephalotes)	single organism signaling (GO:0044700), cellular component biogenesis (GO:0044085), cellular metabolic process (GO:0044237), non-membrane-bounded organelle (GO:0043228), metabolic process (GO:0008152), DNA replication-independent nucleosome organization (GO:0034724), macromolecular complex assembly (GO:0065003), DNA packaging complex (GO:0044815), biological_process (GO:0008150), cellular respons…	Core histone H2A/H2B/H3/H4 (PF00125.19)
protein FAM50 homolog	LOC100116858	NW_001820504.1:2338-4239:+	FAM50 homolog protein	protein FAM50 homolog	XM_008215727.1	XP_008213949.1	protein FAM50 homolog, CG12259, FAM50 homolog protein , NV17397, LOC100116858	AAEL010045 (Aedes aegypti), ACEP15961 (Atta cephlotes), Aqu1.224774 (Amphimedon queenslandica), BGIBMGA000865 (Bombyx mori), ENSG00000071859 (Homo sapiens), ENSMUSG00000001962 (Mus musculus), FBgn0039557 (Drosophila melanogaster), GB17262 (Apis mellifera), GB48682 (Apis mellifera), SINV10963 (Solenopsis invicta), TC008623 (Tribolium castaneum), WBGene00008143 (Caenorhabditis elegans)	biological_process (GO:0008150), single-organism cellular process (GO:0044763), single-multicellular organism process (GO:0044707), intracellular part (GO:0044424), cellular developmental process (GO:0048869), single-organism process (GO:0044699), membrane-bounded organelle (GO:0043227), cellular_component (GO:0005575), cell differentiation (GO:0030154), intracellular (GO:0005622), nervous system…	XAP5, circadian clock regulator (PF04921.9)
uncharacterized protein C15orf41 homolog	LOC100116933	NW_001820504.1:8342-9955:-	Uncharacterized protein C15orf41	uncharacterized LOC100116933	XM_008215729.1, XM_008215728.1	XP_008213951.1, XP_008213950.1	Uncharacterized protein C15orf41 , NV17398, uncharacterized LOC100116933, CG12713, LOC100116933	AAEL001249 (Aedes aegypti), ACEP15962 (Atta cephlotes), BGIBMGA004928 (Bombyx mori), ENSG00000186073 (Homo sapiens), ENSMUSG00000040282 (Mus musculus), FBgn0036536 (Drosophila melanogaster), GB18822 (Apis mellifera), GB48617 (Apis mellifera), SINV11032 (Solenopsis invicta), TC015890 (Tribolium castaneum)	biological_process (GO:0008150), cellular_component (GO:0005575), molecular_function (GO:0003674)	Protein of unknown function TPD sequence-motif (PF14811.1)
ataxin-7-like protein 3	LOC100116970	NW_001820504.1:10582-13902:-	Ataxin-7 protein 3. putative	ataxin-7-like protein 3-like	XM_001601279.3	XP_001601329.1	ataxin-7-like protein 3-like, NV17399, Ataxin-7 protein 3. putative , Sgf11, LOC100116970	AAEL004574 (Aedes aegypti), ACEP15892 (Atta cephlotes), Aqu1.217734 (Amphimedon queenslandica), Aqu1.217735 (Amphimedon queenslandica), BGIBMGA004811 (Bombyx mori), ENSG00000087152 (Homo sapiens), ENSMUSG00000059995 (Mus musculus), FBgn0036804 (Drosophila melanogaster), GB13843 (Apis mellifera), GB45698 (Apis mellifera), TC013649 (Tribolium castaneum), TC015900 (Tribolium castaneum)	SAGA-type complex (GO:0070461), cellular metabolic process (GO:0044237), metabolic process (GO:0008152), biological_process (GO:0008150), regulation of primary metabolic process (GO:0080090), generation of neurons (GO:0048699), single-organism cellular process (GO:0044763), glial cell migration (GO:0008347), cell motility (GO:0048870), chromatin modification (GO:0016568), gliogenesis (GO:0042063)…	Sgf11 (transcriptional regulation protein) (PF08209.6), SCA7, zinc-binding domain (PF08313.7)
3-hydroxy-3-methylglutaryl-coenzyme A reductase	LOC100117068	NC_015868.2:25258632-25279381:+	3-hydroxy-3-methylglutaryl-coenzyme A reductase	3-hydroxy-3-methylglutaryl-coenzyme A reductase-like	XM_008206582.1, XM_008206585.1, XM_008206584.1, XM_008206581.1, XM_008206579.1, XM_008206583.1, XM_008206578.1	XP_008204804.1, XP_008204807.1, XP_008204806.1, XP_008204803.1, XP_008204801.1, XP_008204805.1, XP_008204800.1	3-hydroxy-3-methylglutaryl-coenzyme A reductase , LOC100117068, Hmgcr, NV14819, 3-hydroxy-3-methylglutaryl-coenzyme A reductase-like	AAEL009311 (Aedes aegypti), ACEP19175 (Atta cephlotes), Aqu1.230124 (Amphimedon queenslandica), BGIBMGA003229 (Bombyx mori), ENSG00000113161 (Homo sapiens), ENSMUSG00000021670 (Mus musculus), FBgn0263782 (Drosophila melanogaster), GB18242 (Apis mellifera), GB51591 (Apis mellifera), SINV12393 (Solenopsis invicta), SINV17110 (Solenopsis invicta), SINV20994 (Solenopsis invicta), SINV23640 (Solenopsi…	reproductive process (GO:0022414), cytoplasm (GO:0005737), cellular lipid metabolic process (GO:0044255), cellular metabolic process (GO:0044237), lipid biosynthetic process (GO:0008610), metabolic process (GO:0008152), ribose phosphate metabolic process (GO:0019693), embryo development (GO:0009790), biological_process (GO:0008150), cellular response to stimulus (GO:0051716), single-organism cell…	Hydroxymethylglutaryl-coenzyme A reductase (PF00368.13), Sterol-sensing domain of SREBP cleavage-activation (PF12349.3)
rRNA 2'-O-methyltransferase fibrillarin	LOC100117537	NC_015869.2:7624202-7627345:+	rRNA 2'-O-methyltransferase fibrillarin	rRNA 2'-O-methyltransferase fibrillarin-like	XM_001605673.3	XP_001605723.1	CG10909, rRNA 2'-O-methyltransferase fibrillarin-like, NV11947, Fib, LOC100117537, rRNA 2'-O-methyltransferase fibrillarin	AAEL010248 (Aedes aegypti), ACEP21567 (Atta cephalotes), Aqu1.221654 (Amphimedon queenslandica), BGIBMGA000074 (Bombyx mori), ENSG00000280548 (Homo sapiens), ENSMUSG00000046865 (Mus musculus), FBgn0003062 (Drosophila melanogaster), FBgn0038090 (Drosophila melanogaster), GB13284 (Apis mellifera), GB52500 (Apis mellifera), TC002569 (Tribolium castaneum), WBGene00001423 (Caenorhabditis elegans)	cellular component biogenesis (GO:0044085), ribonucleoprotein complex biogenesis (GO:0022613), cellular metabolic process (GO:0044237), non-membrane-bounded organelle (GO:0043228), nucleoplasm (GO:0005654), metabolic process (GO:0008152), intracellular (GO:0005622), catalytic activity (GO:0003824), rRNA processing (GO:0006364), binding (GO:0005488), macromolecule metabolic process (GO:0043170), o…	Fibrillarin (PF01269.12)
WD repeat-containing protein 75	LOC100118741	NC_015868.2:2072946-2080767:+	WD repeat-containing protein 75	WD repeat-containing protein 75-like	XM_001602588.3	XP_001602638.1	WD repeat-containing protein 75 , NV11083, CG12050, LOC100118741, WD repeat-containing protein 75-like	AAEL006610 (Aedes aegypti), ACEP13115 (Atta cephlotes), Aqu1.223259 (Amphimedon queenslandica), BGIBMGA005358 (Bombyx mori), ENSG00000115368 (Homo sapiens), ENSMUSG00000025995 (Mus musculus), FBgn0032915 (Drosophila melanogaster), GB13528 (Apis mellifera), GB53647 (Apis mellifera), TC003309 (Tribolium castaneum), WBGene00045433 (Caenorhabditis elegans)	non-membrane-bounded organelle (GO:0043228), metabolic process (GO:0008152), biological_process (GO:0008150), nucleolus (GO:0005730), intracellular part (GO:0044424), intracellular non-membrane-bounded organelle (GO:0043232), intracellular organelle part (GO:0044446), nuclear part (GO:0044428), organelle part (GO:0044422), membrane-bounded organelle (GO:0043227), cellular_component (GO:0005575), …	WD domain, G-beta repeat (PF00400.27)
phosphoglycerate mutase 2	LOC100118752	NW_001820749.1:1051378-1052929:+	phosphoglycerate mutase 2	phosphoglycerate mutase 2-like	XM_001602598.3	XP_001602648.2	Pglym87, phosphoglycerate mutase 2 , Pglym78, LOC100118752, phosphoglycerate mutase 2-like, NV12651	AAEL006070 (Aedes aegypti), ACEP22737 (Atta cephlotes), BGIBMGA013244 (Bombyx mori), ENSG00000164708 (Homo sapiens), ENSMUSG00000020475 (Mus musculus), FBgn0011270 (Drosophila melanogaster), FBgn0014869 (Drosophila melanogaster), GB15052 (Apis mellifera), GB46214 (Apis mellifera), SINV22107 (Solenopsis invicta), TC001380 (Tribolium castaneum), TC010847 (Tribolium castaneum)	cytoplasm (GO:0005737), I band (GO:0031674), cellular metabolic process (GO:0044237), non-membrane-bounded organelle (GO:0043228), metabolic process (GO:0008152), generation of precursor metabolites and energy (GO:0006091), biological_process (GO:0008150), single-organism cellular process (GO:0044763), carbohydrate metabolic process (GO:0005975), organic substance catabolic process (GO:1901575), …	Histidine phosphatase superfamily (branch 1) (PF00300.17)
SEC23-interacting protein-like	LOC100118865	NW_001820749.1:1053040-1069644:+	SEC23-interacting protein	uncharacterized LOC100118865	XM_008216412.1, XM_003428058.2, XM_008216411.1, XM_008216413.1, XM_008216414.1, XM_001602690.3	XP_008214634.1, XP_003428106.1, XP_008214633.1, XP_008214635.1, XP_008214636.1, XP_001602740.2	CG8552, NV12652, uncharacterized LOC100118865, SEC23-interacting protein , LOC100118865	AAEL009930 (Aedes aegypti), AAEL014360 (Aedes aegypti), ACEP22982 (Atta cephlotes), Aqu1.207745 (Amphimedon queenslandica), Aqu1.213516 (Amphimedon queenslandica), BGIBMGA001646 (Bombyx mori), ENSG00000107651 (Homo sapiens), ENSMUSG00000061313 (Mus musculus), FBgn0031990 (Drosophila melanogaster), GB18106 (Apis mellifera), GB53979 (Apis mellifera), SINV26259 (Solenopsis invicta), TC001611 (Tribol…	metabolic process (GO:0008152), biological_process (GO:0008150), phosphatidylcholine 1-acylhydrolase activity (GO:0008970), phospholipase activity (GO:0004620), metal ion binding (GO:0046872), catalytic activity (GO:0003824), binding (GO:0005488), hydrolase activity, acting on ester bonds (GO:0016788), carboxylic ester hydrolase activity (GO:0052689), molecular_function (GO:0003674), lipase activ…	DDHD domain (PF02862.12), WWE domain (PF02825.15)
splicing factor 3B subunit 1-like	LOC100118884	NC_015868.2:2085158-2092127:-	splicing factor 3B subunit 1. putative	splicing factor 3B subunit 1-like	XM_001602706.3, XM_008211306.1	XP_001602756.1, XP_008209528.1	NV11085, splicing factor 3B subunit 1-like, LOC100118884, splicing factor 3B subunit 1. putative , CG2807	AAEL003605 (Aedes aegypti), ACEP27679 (Atta cephalotes), ACEP27680 (Atta cephalotes), Aqu1.222096 (Amphimedon queenslandica), BGIBMGA006851 (Bombyx mori), ENSG00000115524 (Homo sapiens), ENSMUSG00000025982 (Mus musculus), FBgn0031266 (Drosophila melanogaster), GB16777 (Apis mellifera), GB53725 (Apis mellifera), SINV12843 (Solenopsis invicta), TC012382 (Tribolium castaneum), WBGene00011605 (Caenor…	U2 snRNP (GO:0005686), cellular metabolic process (GO:0044237), metabolic process (GO:0008152), biological_process (GO:0008150), RNA processing (GO:0006396), cellular macromolecule metabolic process (GO:0044260), mRNA metabolic process (GO:0016071), intracellular part (GO:0044424), heterocyclic compound binding (GO:1901363), RNA splicing, via transesterification reactions with bulged adenosine as…	Splicing factor 3B subunit 1 (PF08920.5)
solute carrier family 25 member 36-A	LOC100118918	NC_015868.2:2092868-2112791:+	solute carrier family 25 member 36-A. putative	solute carrier family 25 member 36-A-like	XM_008211307.1, XM_001602734.3	XP_008209529.1, XP_001602784.1	NV11086, solute carrier family 25 member 36-A. putative , solute carrier family 25 member 36-A-like, Rim2, LOC100118918	AAEL012117 (Aedes aegypti), ACEP21057 (Atta cephlotes), Aqu1.226154 (Amphimedon queenslandica), BGIBMGA007487 (Bombyx mori), ENSG00000114120 (Homo sapiens), ENSMUSG00000032449 (Mus musculus), FBgn0031359 (Drosophila melanogaster), GB14650 (Apis mellifera), GB41824 (Apis mellifera), SINV18785 (Solenopsis invicta), TC006415 (Tribolium castaneum), WBGene00011662 (Caenorhabditis elegans)	cytoplasm (GO:0005737), biological_process (GO:0008150), single-organism cellular process (GO:0044763), transport (GO:0006810), intracellular part (GO:0044424), intracellular organelle part (GO:0044446), membrane (GO:0016020), mitochondrial transport (GO:0006839), single-organism process (GO:0044699), organelle part (GO:0044422), membrane-bounded organelle (GO:0043227), single-organism intracellu…	Mitochondrial carrier protein (PF00153.22)
uncharacterized	LOC100119043	NC_015869.2:15815385-15879164:+	Smell impaired protein. putative	uncharacterized LOC100119043	XM_008218186.1	XP_008216408.1	Pino, NV12394, LOC100119043, Smell impaired protein. putative , uncharacterized LOC100119043	AAEL007114 (Aedes aegypti), ACEP12569 (Atta cephlotes), FBgn0016926 (Drosophila melanogaster), GB18993 (Apis mellifera), GB47026 (Apis mellifera), SINV15529 (Solenopsis invicta), TC006277 (Tribolium castaneum)	chemosensory behavior (GO:0007635), biological_process (GO:0008150), single-organism process (GO:0044699), behavior (GO:0007610), olfactory behavior (GO:0042048), single-organism behavior (GO:0044708), response to chemical (GO:0042221), response to stimulus (GO:0050896)
uncharacterized	LOC100119225	NC_015867.2:6100390-6101093:-	LOC100119225	uncharacterized LOC100119225	XM_008215739.1	XP_008213961.1	uncharacterized LOC100119225, NV18040, LOC100119225
proline-rich protein PRCC	LOC100120368	NC_015868.2:18269847-18272128:+	proline-rich protein PRCC	uncharacterized LOC100120368	XM_008219658.1	XP_008217880.1	CG17249, proline-rich protein PRCC , LOC100120368, NV13403, uncharacterized LOC100120368	AAEL009445 (Aedes aegypti), ACEP27614 (Atta cephlotes), Aqu1.225236 (Amphimedon queenslandica), BGIBMGA013495 (Bombyx mori), ENSG00000143294 (Homo sapiens), ENSMUSG00000004895 (Mus musculus), FBgn0035249 (Drosophila melanogaster), GB16133 (Apis mellifera), SINV20631 (Solenopsis invicta), TC003093 (Tribolium castaneum), WBGene00008034 (Caenorhabditis elegans)
pyrokinin/capa receptor 2	LOC100120473	NC_015867.2:5973739-5975189:+	Neuropeptides capa receptor		NM_001159915.1	NP_001153387.1	LOC100120473, LOC100678058, Neuropeptides capa receptor	WBGene00016747 (Caenorhabditis elegans), WBGene00017176 (Caenorhabditis elegans), WBGene00019616 (Caenorhabditis elegans)	single organism signaling (GO:0044700), cell surface receptor signaling pathway (GO:0007166), biological_process (GO:0008150), cellular response to stimulus (GO:0051716), single-organism cellular process (GO:0044763), neurotransmitter receptor activity (GO:0030594), receptor activity (GO:0004872), cell-cell signaling (GO:0007267), regulation of cellular process (GO:0050794), intrinsic component o…	7 transmembrane receptor (rhodopsin family) (PF00001.16)
collagen alpha-1(XVIII) chain	LOC100120859	NC_015869.2:5099609-5226768:-	LOC100120859		XM_008212204.1, XM_008212205.1, XM_008212201.1, XM_008212203.1, XM_008212209.1, XM_008212211.1, XM_008212207.1, XM_008212210.1, XM_008212206.1, XM_008212208.1	XP_008210426.1, XP_008210427.1, XP_008210423.1, XP_008210425.1, XP_008210431.1, XP_008210433.1, XP_008210429.1, XP_008210432.1, XP_008210428.1, XP_008210430.1	Mp, LOC100120859	AAEL002256 (Aedes aegypti), ACEP22246 (Atta cephlotes), Aqu1.205122 (Amphimedon queenslandica), BGIBMGA012062 (Bombyx mori), BGIBMGA012091 (Bombyx mori), ENSG00000204291 (Homo sapiens), ENSMUSG00000028339 (Mus musculus), FBgn0260660 (Drosophila melanogaster), GB18123 (Apis mellifera), GB40231 (Apis mellifera), SINV21629 (Solenopsis invicta), TC003787 (Tribolium castaneum), WBGene00000527 (Caenorh…	biological_process (GO:0008150), generation of neurons (GO:0048699), single-organism cellular process (GO:0044763), chemotaxis (GO:0006935), single-multicellular organism process (GO:0044707), anatomical structure morphogenesis (GO:0009653), carbohydrate binding (GO:0030246), cellular developmental process (GO:0048869), neuron development (GO:0048666), single-organism process (GO:0044699), cell p…	Collagen triple helix repeat (20 copies) (PF01391.13), Collagenase NC10 and Endostatin (PF06482.6)
tRNA dimethylallyltransferase, mitochondrial	LOC100120934	NC_015869.2:5230358-5294977:-	tRNA dimethylallyltransferase	uncharacterized LOC100120934	XM_008212200.1, XM_001604478.3	XP_008210422.1, XP_001604528.1	tRNA dimethylallyltransferase , NV16690, CG31381, LOC100120934, uncharacterized LOC100120934	AAEL009164 (Aedes aegypti), ACEP22234 (Atta cephalotes), ACEP22239 (Atta cephlotes), Aqu1.221334 (Amphimedon queenslandica), BGIBMGA012005 (Bombyx mori), ENSG00000043514 (Homo sapiens), ENSMUSG00000028653 (Mus musculus), FBgn0043799 (Drosophila melanogaster), GB16433 (Apis mellifera), GB43495 (Apis mellifera), SINV19110 (Solenopsis invicta), TC000060 (Tribolium castaneum), WBGene00001740 (Caenorh…	cellular metabolic process (GO:0044237), RNA modification (GO:0009451), metabolic process (GO:0008152), biological_process (GO:0008150), RNA processing (GO:0006396), tRNA processing (GO:0008033), cellular macromolecule metabolic process (GO:0044260), heterocyclic compound binding (GO:1901363), heterocycle metabolic process (GO:0046483), nucleobase-containing compound metabolic process (GO:0006139…	Zinc-finger double-stranded RNA-binding (PF12171.3), IPP transferase (PF01715.12)
TRPgamma cation channel (aka TRPgamma)	LOC100120998	NC_015869.2:928888-1044509:-	Transient receptor potential-gamma protein	TRPgamma cation channel	XM_008205608.1	XP_008203830.1	LOC100120998, TRPgamma cation channel, TRPgamma, NV14416, Trpgamma, Transient receptor potential-gamma protein	AAEL005014 (Aedes aegypti), ACEP23184 (Atta cephlotes), BGIBMGA001085 (Bombyx mori), ENSG00000133107 (Homo sapiens), ENSMUSG00000027748 (Mus musculus), FBgn0032593 (Drosophila melanogaster), GB11954 (Apis mellifera), GB55618 (Apis mellifera), SINV18922 (Solenopsis invicta), SINV18984 (Solenopsis invicta), TC007033 (Tribolium castaneum), WBGene00006615 (Caenorhabditis elegans)	substrate-specific transmembrane transporter activity (GO:0022891), ion channel activity (GO:0005216), biological_process (GO:0008150), detection of stimulus involved in sensory perception (GO:0050906), rhabdomere (GO:0016028), detection of light stimulus (GO:0009583), ion transmembrane transporter activity (GO:0015075), single-organism cellular process (GO:0044763), transport (GO:0006810), dival…	Ankyrin repeats (3 copies) (PF12796.2), Transient receptor ion channel II (PF08344.6), Ion transport protein (PF00520.26)
turripeptide Pal9.2	LOC100121115	NC_015867.2:6091873-6092271:+	LOC100121115	uncharacterized LOC100121115	XM_001603990.2	XP_001604040.1	NV18039, uncharacterized LOC100121115, LOC100121115	ENSG00000178172 (Homo sapiens)	binding (GO:0005488), molecular_function (GO:0003674), protein binding (GO:0005515)	Kazal-type serine protease inhibitor domain (PF00050.16)
facilitated trehalose transporter Tret1-like	LOC100121131	NC_015869.2:5508987-5514663:-	Sugar transporter ERD6 7. putative	facilitated trehalose transporter Tret1-like	XM_001604667.3	XP_001604717.2	LOC100121131, facilitated trehalose transporter Tret1-like, Sugar transporter ERD6 7. putative , NV16699	ACEP18801 (Atta cephlotes), GB16063 (Apis mellifera), GB43705 (Apis mellifera), GB43737 (Apis mellifera), SINV17828 (Solenopsis invicta), TC000733 (Tribolium castaneum), TC003287 (Tribolium castaneum), TC003288 (Tribolium castaneum), TC003289 (Tribolium castaneum), TC007235 (Tribolium castaneum), TC008119 (Tribolium castaneum), TC009681 (Tribolium castaneum), TC009682 (Tribolium castaneum), TC009…	substrate-specific transmembrane transporter activity (GO:0022891), binding (GO:0005488), biological_process (GO:0008150), single-organism transport (GO:0044765), single-organism cellular process (GO:0044763), transport (GO:0006810), intrinsic component of membrane (GO:0031224), single-organism localization (GO:1902578), transporter activity (GO:0005215), integral component of membrane (GO:001602…	Sugar (and other) transporter (PF00083.19)
unconventional myosin-XVIIIa (aka Myo18)	LOC100121154	NC_015869.2:5522723-5602323:-	Myosin-XVIIIa	myosin 18	XM_008212215.1, XM_001604690.3, XM_008212217.1, XM_008212219.1, XM_008212218.1, XM_008212220.1, XM_008212216.1	XP_008210437.1, XP_001604740.2, XP_008210439.1, XP_008210441.1, XP_008210440.1, XP_008210442.1, XP_008210438.1	Mhcl, myosin 18, NV16700, Myosin-XVIIIa , Myo18, myosin-XVIIIa , LOC100121154	AAEL001948 (Aedes aegypti), ACEP16869 (Atta cephalotes), ACEP18798 (Atta cephalotes), ACEP18799 (Atta cephlotes), ACEP18800 (Atta cephalotes), Aqu1.202155 (Amphimedon queenslandica), Aqu1.219560 (Amphimedon queenslandica), BGIBMGA012920 (Bombyx mori), BGIBMGA012921 (Bombyx mori), ENSG00000196535 (Homo sapiens), ENSMUSG00000000631 (Mus musculus), FBgn0026059 (Drosophila melanogaster), GB16845 (Api…	cellular metabolic process (GO:0044237), non-membrane-bounded organelle (GO:0043228), metabolic process (GO:0008152), ribose phosphate metabolic process (GO:0019693), biological_process (GO:0008150), single-organism cellular process (GO:0044763), nucleoside-triphosphatase activity (GO:0017111), organic substance catabolic process (GO:1901575), aromatic compound catabolic process (GO:0019439), rib…	IQ calmodulin-binding motif (PF00612.22), Myosin tail (PF01576.14), Myosin head (motor domain) (PF00063.16)
microtubule-associated protein futsch-like	LOC100121183	NC_015867.2:6143676-6152220:-	Ras-related and estrogen-regulated growth inhibitor		XM_008215772.1, XM_001604722.3, XM_008215764.1	XP_008213994.1, XP_001604772.2, XP_008213986.1	LOC100121183, Ras-related and estrogen-regulated growth inhibitor , LOC100680112	AAEL011522 (Aedes aegypti), ACEP12601 (Atta cephlotes), Aqu1.214248 (Amphimedon queenslandica), BGIBMGA002446 (Bombyx mori), BGIBMGA002448 (Bombyx mori), GB12993 (Apis mellifera), SINV15488 (Solenopsis invicta), TC011238 (Tribolium castaneum), WBGene00022123 (Caenorhabditis elegans)	single organism signaling (GO:0044700), cellular metabolic process (GO:0044237), metabolic process (GO:0008152), GTP catabolic process (GO:0006184), guanosine-containing compound metabolic process (GO:1901068), GTPase activity (GO:0003924), ribose phosphate metabolic process (GO:0019693), biological_process (GO:0008150), cellular response to stimulus (GO:0051716), DNA binding (GO:0003677), single…	C2H2-type zinc finger (PF13894.1)
zeta-sarcoglycan	LOC100121207	NC_015867.2:6164943-6257458:-	Zeta-sarcoglycan		XM_001604749.3	XP_001604799.2	Zeta-sarcoglycan , LOC100121207, Scgdelta	AAEL005840 (Aedes aegypti), AAEL015069 (Aedes aegypti), ACEP18710 (Atta cephalotes), ACEP18711 (Atta cephlotes), ACEP23489 (Atta cephalotes), Aqu1.220637 (Amphimedon queenslandica), BGIBMGA000920 (Bombyx mori), BGIBMGA001224 (Bombyx mori), ENSG00000185053 (Homo sapiens), ENSMUSG00000039539 (Mus musculus), FBgn0025391 (Drosophila melanogaster), GB19191 (Apis mellifera), GB52356 (Apis mellifera), S…	cellular component biogenesis (GO:0044085), cytoplasm (GO:0005737), non-membrane-bounded organelle (GO:0043228), biological_process (GO:0008150), single-organism cellular process (GO:0044763), plasma membrane (GO:0005886), muscle cell development (GO:0055001), single-multicellular organism process (GO:0044707), intracellular part (GO:0044424), anatomical structure morphogenesis (GO:0009653), musc…	Sarcoglycan complex subunit protein (PF04790.8)
low-density lipoprotein receptor-related protein 6-like	LOC100121254	NC_015867.2:6265199-6270113:+	LOC100121254	low-density lipoprotein receptor-related protein 1-like, low-density lipoprotein receptor-related protein 2-like	XM_008215786.1	XP_008214008.1	LOC100680223, LOC100121254, NV18044, LOC100121254, LOC100680223, low-density lipoprotein receptor-related protein 1-like, low-density lipoprotein receptor-related protein 2-like	SINV12725 (Solenopsis invicta)	receptor activity (GO:0004872), calcium ion binding (GO:0005509), membrane (GO:0016020), cellular_component (GO:0005575), metal ion binding (GO:0046872), binding (GO:0005488), intrinsic component of membrane (GO:0031224), integral component of membrane (GO:0016021), molecular_function (GO:0003674), protein binding (GO:0005515), membrane part (GO:0044425), cation binding (GO:0043169), ion binding …
vacuolar protein sorting-associated protein 54	LOC100121405	NC_015868.2:18918592-18924513:+	Vacuolar protein sorting-associated protein 54	vacuolar protein sorting-associated protein 54-like	XM_008219496.1	XP_008217718.1	scat, LOC100121405, NV13443, vacuolar protein sorting-associated protein 54-like, Vacuolar protein sorting-associated protein 54	AAEL001497 (Aedes aegypti), ACEP20955 (Atta cephlotes), Aqu1.230063 (Amphimedon queenslandica), BGIBMGA010625 (Bombyx mori), ENSG00000143952 (Homo sapiens), ENSMUSG00000020128 (Mus musculus), FBgn0011232 (Drosophila melanogaster), GB12582 (Apis mellifera), GB48031 (Apis mellifera), SINV12073 (Solenopsis invicta), TC012073 (Tribolium castaneum), WBGene00006934 (Caenorhabditis elegans)	reproductive process (GO:0022414), cytoplasm (GO:0005737), spermatid development (GO:0007286), biological_process (GO:0008150), single-organism cellular process (GO:0044763), multi-organism process (GO:0051704), transport (GO:0006810), retrograde transport, endosome to Golgi (GO:0042147), sperm individualization (GO:0007291), multicellular organismal reproductive process (GO:0048609), reproductio…	Vps54-like protein (PF07928.7), Protein of unknown function N-terminal domain (DUF2450) (PF10475.4)
CD151 antigen-like	LOC100121421	NC_015867.2:6336584-6343615:+	CD151 antigen	tetraspanin-11-like	XM_001604985.3	XP_001605035.1	LOC100121421, Tsp74F, NV18048, tetraspanin-11-like, CD151 antigen	AAEL005137 (Aedes aegypti), ACEP18614 (Atta cephlotes), BGIBMGA001039 (Bombyx mori), FBgn0036769 (Drosophila melanogaster), GB16134 (Apis mellifera), GB55355 (Apis mellifera), TC007531 (Tribolium castaneum)	biological_process (GO:0008150), membrane (GO:0016020), cellular_component (GO:0005575), intrinsic component of membrane (GO:0031224), integral component of membrane (GO:0016021), molecular_function (GO:0003674), membrane part (GO:0044425)	Tetraspanin family (PF00335.15)
cytoplasmic dynein 2 light intermediate chain 1	LOC100121423	NC_015868.2:18924307-18927663:+	Cytoplasmic dynein 2 light intermediate chain 1	cytoplasmic dynein 2 light intermediate chain 1-like	XM_001604987.2	XP_001605037.2	LOC100121423, cytoplasmic dynein 2 light intermediate chain 1-like, Cytoplasmic dynein 2 light intermediate chain 1 , CG3769, NV13444	AAEL001491 (Aedes aegypti), ACEP20956 (Atta cephlotes), Aqu1.214949 (Amphimedon queenslandica), BGIBMGA010624 (Bombyx mori), ENSG00000138036 (Homo sapiens), ENSMUSG00000024253 (Mus musculus), FBgn0032119 (Drosophila melanogaster), GB17212 (Apis mellifera), GB48032 (Apis mellifera), WBGene00006960 (Caenorhabditis elegans)	single organism signaling (GO:0044700), biological_process (GO:0008150), cellular response to stimulus (GO:0051716), single-organism cellular process (GO:0044763), heterocyclic compound binding (GO:1901363), guanyl nucleotide binding (GO:0019001), purine ribonucleotide binding (GO:0032555), single-organism process (GO:0044699), signal transduction (GO:0007165), ribonucleotide binding (GO:0032553)…
endothelin-converting enzyme 1	LOC100121441	NC_015867.2:6345674-6349040:+	Endothelin-converting enzyme 1. putative	endothelin-converting enzyme 1-like	XM_008215847.1	XP_008214069.1	Endothelin-converting enzyme 1. putative , NV18049, LOC100121441, endothelin-converting enzyme 1-like	ACEP10152 (Atta cephalotes), Aqu1.201070 (Amphimedon queenslandica), Aqu1.212445 (Amphimedon queenslandica), Aqu1.212448 (Amphimedon queenslandica), GB43805 (Apis mellifera), GB48006 (Apis mellifera), SINV11659 (Solenopsis invicta), SINV18403 (Solenopsis invicta), SINV18550 (Solenopsis invicta), SINV18663 (Solenopsis invicta), SINV18689 (Solenopsis invicta), WBGene00010070 (Caenorhabditis elegans…	peptidase activity (GO:0008233), cytoplasm (GO:0005737), metabolic process (GO:0008152), biological_process (GO:0008150), peptidase activity, acting on L-amino acid peptides (GO:0070011), intracellular part (GO:0044424), membrane (GO:0016020), protein processing (GO:0016485), membrane-bounded organelle (GO:0043227), cellular_component (GO:0005575), vesicle (GO:0031982), organic substance metaboli…	Peptidase family M13 (PF05649.8), Peptidase family M13 (PF01431.16)
lysine-specific demethylase 6B	LOC100121477	NC_015867.2:6352821-6374668:+	Harmonin		XM_001605040.3	XP_001605090.2	LOC100121477, Harmonin , CG5921	AAEL005634 (Aedes aegypti), ACEP18623 (Atta cephlotes), Aqu1.221104 (Amphimedon queenslandica), BGIBMGA000928 (Bombyx mori), ENSG00000006611 (Homo sapiens), ENSMUSG00000030838 (Mus musculus), FBgn0029835 (Drosophila melanogaster), GB12924 (Apis mellifera), GB53844 (Apis mellifera), GB55356 (Apis mellifera), SINV18813 (Solenopsis invicta), TC007147 (Tribolium castaneum)	binding (GO:0005488), molecular_function (GO:0003674), protein binding (GO:0005515)	PDZ domain (Also known as DHR or GLGF) (PF00595.19)
raf homolog serine/threonine-protein kinase phl	LOC100121496	NC_015869.2:16617195-16622608:+	Raf protein serine/threonine-protein kinase dRAF-1. putative	raf homolog serine/threonine-protein kinase phl-like	XM_001605057.3, XM_008218308.1, XM_008218309.1, XM_008218311.1, XM_008218310.1	XP_001605107.1, XP_008216530.1, XP_008216531.1, XP_008216533.1, XP_008216532.1	Raf protein serine/threonine-protein kinase dRAF-1. putative , NV12479, raf homolog serine/threonine-protein kinase phl-like, phl, LOC100121496	AAEL013858 (Aedes aegypti), Aqu1.223147 (Amphimedon queenslandica), BGIBMGA007963 (Bombyx mori), ENSG00000157764 (Homo sapiens), ENSMUSG00000002413 (Mus musculus), FBgn0003079 (Drosophila melanogaster), GB16508 (Apis mellifera), GB49120 (Apis mellifera), TC011404 (Tribolium castaneum), WBGene00003030 (Caenorhabditis elegans)	single organism signaling (GO:0044700), tissue migration (GO:0090130), gland development (GO:0048732), imaginal disc-derived appendage morphogenesis (GO:0035114), reproductive process (GO:0022414), segmentation (GO:0035282), protein kinase activity (GO:0004672), cellular metabolic process (GO:0044237), branching morphogenesis of an epithelial tube (GO:0048754), terminal region determination (GO:0…	Raf-like Ras-binding domain (PF02196.10), Phorbol esters/diacylglycerol binding domain (C1 domain) (PF00130.17), Protein tyrosine kinase (PF07714.12)
myotubularin-related protein 2	LOC100121534	NC_015869.2:16658510-16662576:+	myotubularin-related protein 2	myotubularin-related protein 2-like	XM_003423993.2, XM_008218314.1	XP_003424041.1, XP_008216536.1	myotubularin-related protein 2-like, NV12480, myotubularin-related protein 2 , LOC100121534, mtm	AAEL005367 (Aedes aegypti), ACEP18391 (Atta cephlotes), Aqu1.216901 (Amphimedon queenslandica), Aqu1.216902 (Amphimedon queenslandica), BGIBMGA007847 (Bombyx mori), ENSG00000087053 (Homo sapiens), ENSMUSG00000031918 (Mus musculus), FBgn0025742 (Drosophila melanogaster), GB18011 (Apis mellifera), GB49124 (Apis mellifera), TC000531 (Tribolium castaneum), WBGene00003475 (Caenorhabditis elegans)	cellular component biogenesis (GO:0044085), cytoplasm (GO:0005737), cellular metabolic process (GO:0044237), metabolic process (GO:0008152), macromolecular complex assembly (GO:0065003), biological_process (GO:0008150), mitotic cell cycle (GO:0000278), chromosome segregation (GO:0007059), single-organism cellular process (GO:0044763), cellular macromolecule metabolic process (GO:0044260), protein…	Myotubularin-like phosphatase domain (PF06602.9), GRAM domain (PF02893.15)
ras suppressor protein 1	LOC100121535	NC_015867.2:6386033-6388103:+	ras suppressor protein 1	ras suppressor protein 1-like	XM_001605095.3	XP_001605145.1	ras suppressor protein 1 , ics, LOC100121535, NV18053, ras suppressor protein 1-like	AAEL002678 (Aedes aegypti), ACEP23789 (Atta cephlotes), Aqu1.218596 (Amphimedon queenslandica), Aqu1.218597 (Amphimedon queenslandica), BGIBMGA008020 (Bombyx mori), ENSG00000148484 (Homo sapiens), ENSMUSG00000026727 (Mus musculus), FBgn0028546 (Drosophila melanogaster), GB11133 (Apis mellifera), GB55077 (Apis mellifera), SINV23894 (Solenopsis invicta), TC004946 (Tribolium castaneum), WBGene000079…	regulation of stress-activated MAPK cascade (GO:0032872), imaginal disc-derived appendage morphogenesis (GO:0035114), regulation of protein serine/threonine kinase activity (GO:0071900), biological_process (GO:0008150), regulation of phosphorylation (GO:0042325), imaginal disc morphogenesis (GO:0007560), regulation of primary metabolic process (GO:0080090), negative regulation of JUN kinase activ…	Leucine rich repeat (PF13855.1), Leucine Rich Repeat (PF00560.28)
protein FAM102A	LOC100121584	NC_015869.2:16669845-16726708:-	FAM102B. protein		XM_001605144.3, XM_008218315.1	XP_001605194.2, XP_008216537.1	CG8671, FAM102B. protein , LOC100121584	AAEL005389 (Aedes aegypti), ACEP18394 (Atta cephlotes), ACEP18395 (Atta cephalotes), Aqu1.202841 (Amphimedon queenslandica), Aqu1.222576 (Amphimedon queenslandica), BGIBMGA007974 (Bombyx mori), BGIBMGA007975 (Bombyx mori), ENSG00000167106 (Homo sapiens), ENSMUSG00000039157 (Mus musculus), FBgn0032938 (Drosophila melanogaster), GB16310 (Apis mellifera), GB49076 (Apis mellifera), SINV18134 (Solenop…	RNA transport (GO:0050658), dsRNA transport (GO:0033227), biological_process (GO:0008150), transport (GO:0006810), RNA localization (GO:0006403), single-organism process (GO:0044699), macromolecule localization (GO:0033036), nucleobase-containing compound transport (GO:0015931), single-organism transport (GO:0044765), establishment of RNA localization (GO:0051236), single-organism localization (G…	N-terminal C2 in EEIG1 and EHBP1 proteins (PF10358.4)
serine-enriched protein	LOC100121711	NC_015868.2:19409247-19412540:-	LOC100121711	uncharacterized LOC100121711	XM_008219524.1, XM_008219523.1, XM_008219528.1, XM_008219527.1, XM_008219526.1	XP_008217746.1, XP_008217745.1, XP_008217750.1, XP_008217749.1, XP_008217748.1	LOC100121711, NV13452, uncharacterized LOC100121711, gprs	AAEL001149 (Aedes aegypti), ACEP25247 (Atta cephlotes), Aqu1.222098 (Amphimedon queenslandica), BGIBMGA005281 (Bombyx mori), FBgn0024232 (Drosophila melanogaster), GB14048 (Apis mellifera), GB49853 (Apis mellifera), SINV13557 (Solenopsis invicta)	biological_process (GO:0008150), cellular_component (GO:0005575), binding (GO:0005488), molecular_function (GO:0003674), protein binding (GO:0005515)	BTB And C-terminal Kelch (PF07707.10), BTB/POZ domain (PF00651.26)
putative polypeptide N-acetylgalactosaminyltransferase 9	LOC100121727	NC_015868.2:19414730-19441910:-	polypeptide N-acetylgalactosaminyltransferase 9. putative. putative	putative polypeptide N-acetylgalactosaminyltransferase 9-like	XM_008219531.1, XM_008219530.1	XP_008217753.1, XP_008217752.1	CG30463, polypeptide N-acetylgalactosaminyltransferase 9. putative. putative , NV13453, putative polypeptide N-acetylgalactosaminyltransferase 9-like, LOC100121727	AAEL001121 (Aedes aegypti), ACEP25245 (Atta cephalotes), BGIBMGA005279 (Bombyx mori), FBgn0050463 (Drosophila melanogaster), GB13681 (Apis mellifera), GB49852 (Apis mellifera), SINV13589 (Solenopsis invicta), TC005479 (Tribolium castaneum), WBGene00001630 (Caenorhabditis elegans)	cytoplasm (GO:0005737), cellular metabolic process (GO:0044237), metabolic process (GO:0008152), carbohydrate derivative biosynthetic process (GO:1901137), biological_process (GO:0008150), single-organism cellular process (GO:0044763), carbohydrate metabolic process (GO:0005975), cellular macromolecule metabolic process (GO:0044260), intracellular part (GO:0044424), transferase activity (GO:00167…	Glycosyl transferase family 2 (PF00535.21), Ricin-type beta-trefoil lectin domain (PF00652.17)
GTP cyclohydrolase 1	LOC100121765	NC_015869.2:7630186-7646978:-	GTP cyclohydrolase 1		XM_001605321.3, XM_008215254.1	XP_001605371.2, XP_008213476.1	GTP cyclohydrolase 1 , LOC100121765, Pu	AAEL002261 (Aedes aegypti), ACEP21557 (Atta cephlotes), Aqu1.224558 (Amphimedon queenslandica), BGIBMGA001235 (Bombyx mori), ENSG00000131979 (Homo sapiens), ENSMUSG00000037580 (Mus musculus), FBgn0003162 (Drosophila melanogaster), GB15785 (Apis mellifera), GB52348 (Apis mellifera), TC010564 (Tribolium castaneum), WBGene00000298 (Caenorhabditis elegans)	pteridine-containing compound biosynthetic process (GO:0042559), cytoplasm (GO:0005737), cellular metabolic process (GO:0044237), metabolic process (GO:0008152), alpha-amino acid biosynthetic process (GO:1901607), coenzyme biosynthetic process (GO:0009108), embryo development (GO:0009790), biological_process (GO:0008150), mitotic cell cycle (GO:0000278), GTP cyclohydrolase I activity (GO:0003934)…	GTP cyclohydrolase I (PF01227.17)
prominin-1	LOC100121838	NW_001820749.1:2343347-2357209:-	Prominin-1	prominin-1-like	XM_001605398.3	XP_001605448.2	prom, NV25636, Prominin-1 , LOC100121838, prominin-1-like	AAEL003441 (Aedes aegypti), ACEP22900 (Atta cephlotes), ACEP22910 (Atta cephlotes), BGIBMGA011557 (Bombyx mori), BGIBMGA011558 (Bombyx mori), FBgn0259210 (Drosophila melanogaster), GB16040 (Apis mellifera), GB48509 (Apis mellifera), SINV19765 (Solenopsis invicta), SINV19787 (Solenopsis invicta), TC000368 (Tribolium castaneum)	cellular metabolic process (GO:0044237), RNA modification (GO:0009451), metabolic process (GO:0008152), sensory organ morphogenesis (GO:0090596), biological_process (GO:0008150), generation of neurons (GO:0048699), eye morphogenesis (GO:0048592), photoreceptor cell differentiation (GO:0046530), single-organism cellular process (GO:0044763), cellular macromolecule metabolic process (GO:0044260), s…	Prominin (PF05478.6)
intraflagellar transport protein 140 homolog	LOC100121859	NC_015867.2:1202241-1207911:-	LOC100121859		XM_008204530.1	XP_008202752.1	LOC100121859
leptin receptor gene-related protein	LOC100121873	NC_015867.2:1208169-1209950:-	leptin receptor overlapping transcript 1	leptin receptor overlapping transcript-like 1-like	XM_008204535.1	XP_008202757.1	leptin receptor overlapping transcript-like 1-like, CG30423, NV13979, LOC100121873, leptin receptor overlapping transcript 1	AAEL014484 (Aedes aegypti), ACEP22422 (Atta cephlotes), Aqu1.219291 (Amphimedon queenslandica), BGIBMGA001920 (Bombyx mori), ENSG00000104660 (Homo sapiens), ENSMUSG00000031513 (Mus musculus), FBgn0050423 (Drosophila melanogaster), GB43320 (Apis mellifera), WBGene00016244 (Caenorhabditis elegans)		Vacuolar protein sorting 55 (PF04133.9)
transitional endoplasmic reticulum ATPase TER94	LOC100121887	NC_015867.2:1210837-1215374:+	transitional endoplasmic reticulum ATPase TER94	transitional endoplasmic reticulum ATPase TER94-like	XM_001605447.3	XP_001605497.2	NV13980, transitional endoplasmic reticulum ATPase TER94-like, LOC100121887, TER94, transitional endoplasmic reticulum ATPase TER94	AAEL010585 (Aedes aegypti), AAEL012364 (Aedes aegypti), ACEP22426 (Atta cephlotes), Aqu1.219723 (Amphimedon queenslandica), Aqu1.219726 (Amphimedon queenslandica), Aqu1.228118 (Amphimedon queenslandica), BGIBMGA003985 (Bombyx mori), ENSG00000165280 (Homo sapiens), ENSMUSG00000028452 (Mus musculus), FBgn0261014 (Drosophila melanogaster), GB20017 (Apis mellifera), GB50274 (Apis mellifera), SINV2417…	cellular component biogenesis (GO:0044085), developmental maturation (GO:0021700), reproductive process (GO:0022414), oocyte microtubule cytoskeleton organization (GO:0016325), segmentation (GO:0035282), positive regulation of proteasomal ubiquitin-dependent protein catabolic process (GO:0032436), cytoplasm (GO:0005737), cellular metabolic process (GO:0044237), non-membrane-bounded organelle (GO:…	Cell division protein 48 (CDC48), N-terminal domain (PF02359.13), Cell division protein 48 (CDC48), domain 2 (PF02933.12), ATPase family associated with various cellular activities (AAA) (PF00004.24), Vps4 C terminal oligomerisation domain (PF09336.5)
WD repeat domain phosphoinositide-interacting protein 2	LOC100121906	NC_015867.2:1215466-1224304:-	WD repeat domain phosphoinositide-interacting protein 2. putative	uncharacterized LOC100121906	XM_008204538.1, XM_001605463.3	XP_008202760.1, XP_001605513.2	LOC100121906, Atg18a, WD repeat domain phosphoinositide-interacting protein 2. putative , uncharacterized LOC100121906, NV13981	AAEL013995 (Aedes aegypti), ACEP22413 (Atta cephlotes), ENSG00000157954 (Homo sapiens), ENSMUSG00000029578 (Mus musculus), FBgn0035850 (Drosophila melanogaster), GB17303 (Apis mellifera), GB49949 (Apis mellifera), TC006217 (Tribolium castaneum), WBGene00018294 (Caenorhabditis elegans)	cellular component biogenesis (GO:0044085), cytoplasm (GO:0005737), phosphatidylinositol-3,5-bisphosphate binding (GO:0080025), regulation of defense response (GO:0031347), autophagy (GO:0006914), cellular metabolic process (GO:0044237), metabolic process (GO:0008152), biological_process (GO:0008150), cellular response to stimulus (GO:0051716), single-organism cellular process (GO:0044763), regul…	WD domain, G-beta repeat (PF00400.27)
trace amine-associated receptor 8b	LOC100122064	NW_001820749.1:2391366-2427583:+	trace amine-associated receptor 8b. putative	orphan receptor	XM_001606311.3	XP_001606361.2	NV12715, trace amine-associated receptor 8b. putative , LOC100122064, CG13579, orphan receptor	AAEL000528 (Aedes aegypti), ACEP22916 (Atta cephlotes), BGIBMGA011554 (Bombyx mori), FBgn0035010 (Drosophila melanogaster), GB12670 (Apis mellifera), GB42323 (Apis mellifera), SINV19773 (Solenopsis invicta), SINV19777 (Solenopsis invicta), TC001180 (Tribolium castaneum)	single organism signaling (GO:0044700), biological_process (GO:0008150), cellular response to stimulus (GO:0051716), single-organism cellular process (GO:0044763), receptor activity (GO:0004872), transmembrane signaling receptor activity (GO:0004888), signaling receptor activity (GO:0038023), G-protein coupled receptor signaling pathway (GO:0007186), membrane (GO:0016020), single-organism process…	7 transmembrane receptor (rhodopsin family) (PF00001.16)
G-protein-signaling modulator 2	LOC100122113	NW_001820749.1:2434725-2439375:+	G-protein-signaling modulator 2	G-protein-signaling modulator 2-like	XM_003428114.2	XP_003428162.1	G-protein-signaling modulator 2-like, NV12716, pins, LOC100122113, G-protein-signaling modulator 2	AAEL008688 (Aedes aegypti), AAEL014195 (Aedes aegypti), ACEP10846 (Atta cephalotes), ACEP25307 (Atta cephlotes), Aqu1.219011 (Amphimedon queenslandica), Aqu1.227277 (Amphimedon queenslandica), BGIBMGA003867 (Bombyx mori), ENSG00000121957 (Homo sapiens), ENSMUSG00000027883 (Mus musculus), FBgn0040080 (Drosophila melanogaster), GB15846 (Apis mellifera), GB45071 (Apis mellifera), SINV19750 (Solenops…	single organism signaling (GO:0044700), cytoplasm (GO:0005737), asymmetric protein localization involved in cell fate determination (GO:0045167), positive regulation of molecular function (GO:0044093), apical part of cell (GO:0045177), biological_process (GO:0008150), cellular response to stimulus (GO:0051716), mitotic cell cycle (GO:0000278), regulation of primary metabolic process (GO:0080090),…	Tetratricopeptide repeat (PF00515.23), TPR repeat (PF13414.1), Tetratricopeptide repeat (PF13424.1), GoLoco motif (PF02188.12)
G-protein-signaling modulator 2 pseudogene	LOC100122137	NW_001820749.1:2441905-2444876:+	G-protein-signaling modulator 2		XM_003428034.2	XP_003428082.1	LOC100122137, pins, G-protein-signaling modulator 2	AAEL008688 (Aedes aegypti), AAEL014195 (Aedes aegypti), ACEP10846 (Atta cephalotes), ACEP25307 (Atta cephlotes), Aqu1.219011 (Amphimedon queenslandica), Aqu1.227277 (Amphimedon queenslandica), BGIBMGA003867 (Bombyx mori), FBgn0040080 (Drosophila melanogaster), GB45071 (Apis mellifera), SINV19750 (Solenopsis invicta), TC003257 (Tribolium castaneum), WBGene00000092 (Caenorhabditis elegans)	single organism signaling (GO:0044700), regulation of biological quality (GO:0065008), cytoplasm (GO:0005737), GTPase regulator activity (GO:0030695), identical protein binding (GO:0042802), intracellular (GO:0005622), asymmetric protein localization involved in cell fate determination (GO:0045167), binding (GO:0005488), positive regulation of molecular function (GO:0044093), positive regulation …	Tetratricopeptide repeat (PF13176.1), Tetratricopeptide repeat (PF13424.1), GoLoco motif (PF02188.12)
uncharacterized (OBP59)	LOC100122167	NW_001820749.1:2446922-2447871:-	LOC100122167	uncharacterized LOC100122167	XM_008216528.1	XP_008214750.1	uncharacterized LOC100122167, LOC100122167, NV12719		binding (GO:0005488), odorant binding (GO:0005549), molecular_function (GO:0003674)	PBP/GOBP family (PF01395.17)
phosphatidylinositol 3-kinase regulatory subunit alpha	LOC100122747	NC_015867.2:2082920-2130048:-	Phosphatidylinositol 3-kinase regulatory subunit alpha	phosphatidylinositol 3-kinase regulatory subunit alpha-like	XM_001606295.3, XM_008204607.1	XP_001606345.2, XP_008202829.1	NV14001, Pi3K21B, Phosphatidylinositol 3-kinase regulatory subunit alpha , phosphatidylinositol 3-kinase regulatory subunit alpha-like, LOC100122747	AAEL013596 (Aedes aegypti), ACEP27409 (Atta cephlotes), ACEP27415 (Atta cephlotes), Aqu1.204765 (Amphimedon queenslandica), Aqu1.221456 (Amphimedon queenslandica), BGIBMGA010561 (Bombyx mori), ENSG00000145675 (Homo sapiens), ENSMUSG00000041417 (Mus musculus), FBgn0020622 (Drosophila melanogaster), GB10673 (Apis mellifera), GB10865 (Apis mellifera), GB42198 (Apis mellifera), GB42200 (Apis mellifer…	single organism signaling (GO:0044700), cytoplasm (GO:0005737), cellular lipid metabolic process (GO:0044255), cellular metabolic process (GO:0044237), positive regulation of growth (GO:0045927), metabolic process (GO:0008152), regulation of cellular component size (GO:0032535), phosphatidylinositol 3-kinase regulator activity (GO:0035014), biological_process (GO:0008150), cellular response to st…	SAM domain (Sterile alpha motif) (PF07647.12), SH2 domain (PF00017.19), Phorbol esters/diacylglycerol binding domain (C1 domain) (PF00130.17), RhoGAP domain (PF00620.22)
ubiquitin thioesterase OTU1	LOC100122756	NC_015867.2:2132192-2134325:-	ubiquitin thioesterase OTU1. putative	ubiquitin thioesterase OTU1-like	XM_001606304.3, XM_008204608.1	XP_001606354.1, XP_008202830.1	NV14002, LOC100122756, CG4603, ubiquitin thioesterase OTU1. putative , ubiquitin thioesterase OTU1-like	AAEL013994 (Aedes aegypti), ACEP15119 (Atta cephlotes), Aqu1.203839 (Amphimedon queenslandica), Aqu1.206358 (Amphimedon queenslandica), Aqu1.217741 (Amphimedon queenslandica), Aqu1.217742 (Amphimedon queenslandica), Aqu1.217743 (Amphimedon queenslandica), BGIBMGA002520 (Bombyx mori), ENSG00000180667 (Homo sapiens), ENSMUSG00000046404 (Mus musculus), FBgn0035593 (Drosophila melanogaster), GB20067 …	cellular metabolic process (GO:0044237), metabolic process (GO:0008152), biological_process (GO:0008150), single-organism cellular process (GO:0044763), oxoacid metabolic process (GO:0043436), single-organism process (GO:0044699), cellular amino acid metabolic process (GO:0006520), cellular_component (GO:0005575), organic substance metabolic process (GO:0071704), thiolester hydrolase activity (GO…	OTU-like cysteine protease (PF02338.14)
neuronal membrane glycoprotein M6-a	LOC100122772	NC_015867.2:2138813-2145776:+	neuronal membrane glycoprotein M6-b. putative	neuronal membrane glycoprotein M6-b-like	XM_003425484.2, XM_001606322.3	XP_003425532.1, XP_001606372.1	neuronal membrane glycoprotein M6-b. putative , neuronal membrane glycoprotein M6-b-like, NV14003, M6, LOC100122772	AAEL009367 (Aedes aegypti), ACEP18727 (Atta cephlotes), Aqu1.225627 (Amphimedon queenslandica), BGIBMGA007755 (Bombyx mori), ENSG00000046653 (Homo sapiens), ENSMUSG00000031342 (Mus musculus), FBgn0037092 (Drosophila melanogaster), GB16856 (Apis mellifera), GB55661 (Apis mellifera), SINV18804 (Solenopsis invicta), TC007808 (Tribolium castaneum), WBGene00017437 (Caenorhabditis elegans)	reproductive process (GO:0022414), biological_process (GO:0008150), single-organism cellular process (GO:0044763), multi-organism process (GO:0051704), plasma membrane (GO:0005886), multicellular organismal reproductive process (GO:0048609), reproduction (GO:0000003), membrane (GO:0016020), cellular developmental process (GO:0048869), single-organism process (GO:0044699), oogenesis (GO:0048477), …	Myelin proteolipid protein (PLP or lipophilin) (PF01275.14)
N-acetylglucosaminyl-phosphatidylinositol de-N-acetylase	LOC100122783	NC_015867.2:2145892-2147883:-	N-acetylglucosaminyl-phosphatidylinositol de-N-acetylase	N-acetylglucosaminyl-phosphatidylinositol de-N-acetylase-like	XM_008204613.1, XM_008204612.1, XM_001606336.3	XP_008202835.1, XP_008202834.1, XP_001606386.2	N-acetylglucosaminyl-phosphatidylinositol de-N-acetylase , N-acetylglucosaminyl-phosphatidylinositol de-N-acetylase-like, CG4433, LOC100122783, NV14004	AAEL004143 (Aedes aegypti), ACEP18736 (Atta cephlotes), BGIBMGA012874 (Bombyx mori), ENSG00000108474 (Homo sapiens), ENSMUSG00000014245 (Mus musculus), FBgn0038763 (Drosophila melanogaster), GB19790 (Apis mellifera), GB55354 (Apis mellifera), TC015071 (Tribolium castaneum), WBGene00013131 (Caenorhabditis elegans)	metabolic process (GO:0008152), biological_process (GO:0008150), hydrolase activity, acting on carbon-nitrogen (but not peptide) bonds (GO:0016810), N-acetylglucosaminylphosphatidylinositol deacetylase activity (GO:0000225), catalytic activity (GO:0003824), deacetylase activity (GO:0019213), hydrolase activity, acting on carbon-nitrogen (but not peptide) bonds, in linear amides (GO:0016811), mole…	GlcNAc-PI de-N-acetylase (PF02585.12)
blood vessel epicardial substance	LOC100122792	NC_015867.2:2153025-2160633:-	blood vessel epicardial substance	blood vessel epicardial substance-like	XM_008204618.1, XM_008204619.1, XM_003425485.2, XM_008204615.1, XM_008204614.1, XM_008204617.1, XM_008204616.1	XP_008202840.1, XP_008202841.1, XP_003425533.1, XP_008202837.1, XP_008202836.1, XP_008202839.1, XP_008202838.1	blood vessel epicardial substance-like, NV14006, blood vessel epicardial substance , bves, LOC100122792	AAEL007746 (Aedes aegypti), ACEP13758 (Atta cephlotes), BGIBMGA011292 (Bombyx mori), ENSG00000112276 (Homo sapiens), ENSMUSG00000071317 (Mus musculus), FBgn0031150 (Drosophila melanogaster), GB19343 (Apis mellifera), GB48829 (Apis mellifera), SINV15374 (Solenopsis invicta), SINV15375 (Solenopsis invicta), TC013794 (Tribolium castaneum), TC013795 (Tribolium castaneum)	membrane (GO:0016020), cellular_component (GO:0005575)	Popeye protein conserved region (PF04831.8)
protein trachealess	LOC100122804	NW_001815126.1:1604558-1691351:-	trachealess protein		XM_008203776.1	XP_008201998.1	trh, trachealess protein , Trachealess , LOC100122804	AAEL002343 (Aedes aegypti), AAEL014740 (Aedes aegypti), ACEP14936 (Atta cephalotes), ACEP14937 (Atta cephlotes), Aqu1.222843 (Amphimedon queenslandica), BGIBMGA010185 (Bombyx mori), ENSG00000151322 (Homo sapiens), ENSMUSG00000021010 (Mus musculus), FBgn0262139 (Drosophila melanogaster), GB17871 (Apis mellifera), GB52114 (Apis mellifera), SINV11817 (Solenopsis invicta), TC001448 (Tribolium castane…	single organism signaling (GO:0044700), Malpighian tubule morphogenesis (GO:0007443), renal tubule morphogenesis (GO:0061333), gland development (GO:0048732), tube formation (GO:0035148), positive regulation of biosynthetic process (GO:0009891), cellular metabolic process (GO:0044237), metabolic process (GO:0008152), embryo development (GO:0009790), embryonic morphogenesis (GO:0048598), biologica…	PAS fold (PF00989.19), PAS fold (PF08447.6)
histone H3	LOC100122816	NC_015867.2:2165023-2165573:+	Histone H3.3		XM_003425487.2	XP_003425535.1	Histone H3.3 , LOC100122816		cellular component biogenesis (GO:0044085), cellular metabolic process (GO:0044237), non-membrane-bounded organelle (GO:0043228), metabolic process (GO:0008152), macromolecular complex assembly (GO:0065003), DNA packaging complex (GO:0044815), biological_process (GO:0008150), DNA binding (GO:0003677), regulation of primary metabolic process (GO:0080090), nucleosome (GO:0000786), cellular macromol…	Core histone H2A/H2B/H3/H4 (PF00125.19)
histone H2B	LOC100122829	NC_015867.2:2166186-2166641:-	Histone H2B.3	histone H2B.1/H2B.2-like, histone H2B 1/2-like	XM_001607141.2	XP_001607191.1	histone H2B.1/H2B.2-like, histone H2B 1/2-like, LOC100115273, LOC100117660, LOC100118190, LOC100121899, LOC100121933, LOC100122693, LOC100122732, LOC100122751, LOC100122829, LOC100123528, LOC100123996, LOC100124016, LOC100680293, LOC100122829, NV14008, Histone H2B.3	AAEL015674 (Aedes aegypti), AAEL015675 (Aedes aegypti), AAEL015676 (Aedes aegypti), AAEL015677 (Aedes aegypti), AAEL015678 (Aedes aegypti), AAEL015679 (Aedes aegypti), AAEL015680 (Aedes aegypti), AAEL015681 (Aedes aegypti), AAEL015682 (Aedes aegypti), AAEL015683 (Aedes aegypti), AAEL015684 (Aedes aegypti), ACEP13007 (Atta cephalotes), ACEP13011 (Atta cephalotes), ACEP26429 (Atta cephalotes), ACEP…	cellular component biogenesis (GO:0044085), cellular metabolic process (GO:0044237), non-membrane-bounded organelle (GO:0043228), NuA4 histone acetyltransferase complex (GO:0035267), metabolic process (GO:0008152), macromolecular complex assembly (GO:0065003), DNA packaging complex (GO:0044815), biological_process (GO:0008150), DNA binding (GO:0003677), nucleosome (GO:0000786), cellular macromole…	Core histone H2A/H2B/H3/H4 (PF00125.19)
histone H2A	LOC100122841	NC_015867.2:2166738-2167290:+	Histone H2A.J	histone H2A	XM_001606397.3	XP_001606447.1	His2A:CG33859, Histone H2A.J , His2A:CG33817, His2A:CG33856, histone H2A, His2A:CG33841, His2A:CG33862, NV14009, His2A:CG33826, His2A:CG33853, LOC100122841	AAEL000494 (Aedes aegypti), AAEL000497 (Aedes aegypti), AAEL000518 (Aedes aegypti), AAEL000525 (Aedes aegypti), AAEL003818 (Aedes aegypti), AAEL003820 (Aedes aegypti), AAEL003826 (Aedes aegypti), AAEL003851 (Aedes aegypti), AAEL003862 (Aedes aegypti), AAEL007005 (Aedes aegypti), ACEP13015 (Atta cephalotes), ACEP26431 (Atta cephalotes), ACEP26445 (Atta cephalotes), Aqu1.205688 (Amphimedon queensla…	cellular component biogenesis (GO:0044085), cellular metabolic process (GO:0044237), non-membrane-bounded organelle (GO:0043228), metabolic process (GO:0008152), macromolecular complex assembly (GO:0065003), DNA packaging complex (GO:0044815), biological_process (GO:0008150), DNA binding (GO:0003677), nucleosome (GO:0000786), cellular macromolecule metabolic process (GO:0044260), nucleosome organ…	Core histone H2A/H2B/H3/H4 (PF00125.19)
clarin-3	LOC100122852	NC_015867.2:2167726-2169849:+	LOC100122852	uncharacterized LOC100122852	XM_001606407.3, XM_008204624.1, XM_008204622.1, XM_008204623.1, XM_008204621.1	XP_001606457.2, XP_008202846.1, XP_008202844.1, XP_008202845.1, XP_008202843.1	uncharacterized LOC100122852, LOC100122852, NV14010, CG1103	AAEL010407 (Aedes aegypti), ACEP13052 (Atta cephalotes), ACEP13058 (Atta cephlotes), BGIBMGA002331 (Bombyx mori), ENSG00000180745 (Homo sapiens), ENSMUSG00000050866 (Mus musculus), FBgn0037235 (Drosophila melanogaster), GB10713 (Apis mellifera), GB46496 (Apis mellifera), SINV13162 (Solenopsis invicta), TC012171 (Tribolium castaneum), WBGene00235279 (Caenorhabditis elegans)	biological_process (GO:0008150), membrane (GO:0016020), cellular_component (GO:0005575), intrinsic component of membrane (GO:0031224), integral component of membrane (GO:0016021), molecular_function (GO:0003674), membrane part (GO:0044425)	PMP-22/EMP/MP20/Claudin tight junction (PF13903.1)
mitochondrial inner membrane protease ATP23 homolog	LOC100122860	NC_015867.2:2170033-2171709:+	Mitochondrial inner membrane Protease ATP23	mitochondrial inner membrane protease ATP23 homolog	XM_008204625.1	XP_008202847.1	NV14011, LOC100122860, CG5131, mitochondrial inner membrane protease ATP23 homolog, Mitochondrial inner membrane Protease ATP23	AAEL000332 (Aedes aegypti), ACEP13413 (Atta cephlotes), Aqu1.228911 (Amphimedon queenslandica), BGIBMGA006761 (Bombyx mori), ENSG00000262145 (Homo sapiens), ENSMUSG00000025436 (Mus musculus), FBgn0032644 (Drosophila melanogaster), GB12965 (Apis mellifera), GB44712 (Apis mellifera), SINV24324 (Solenopsis invicta), TC003033 (Tribolium castaneum)	peptidase activity (GO:0008233), metabolic process (GO:0008152), biological_process (GO:0008150), peptidase activity, acting on L-amino acid peptides (GO:0070011), organic substance metabolic process (GO:0071704), catalytic activity (GO:0003824), macromolecule metabolic process (GO:0043170), protein metabolic process (GO:0019538), KU70 binding (GO:0017170), primary metabolic process (GO:0044238),…	Peptidase M76 family (PF09768.4)
lachesin	LOC100122873	NW_001815126.1:1843508-1980510:-	lachesin. putative		XM_008203652.1, XM_008203651.1	XP_008201874.1, XP_008201873.1	CG34391, lachesin. putative , LOC100122873	AAEL001790 (Aedes aegypti), AAEL014334 (Aedes aegypti), ACEP20165 (Atta cephlotes), ACEP27574 (Atta cephalotes), ACEP27576 (Atta cephalotes), BGIBMGA012748 (Bombyx mori), BGIBMGA012749 (Bombyx mori), FBgn0085420 (Drosophila melanogaster), GB18058 (Apis mellifera), GB51594 (Apis mellifera), GB53265 (Apis mellifera), SINV20630 (Solenopsis invicta), SINV20650 (Solenopsis invicta), TC004659 (Triboliu…	binding (GO:0005488), molecular_function (GO:0003674), protein binding (GO:0005515)	Immunoglobulin domain (PF13895.1), Immunoglobulin I-set domain (PF07679.11)
DNA methyltransferase 1-associated protein 1	LOC100122874	NC_015867.2:2171711-2173752:-	DNA methyltransferase 1-associated protein 1		XM_003425489.2	XP_003425537.1	DNA methyltransferase 1-associated protein 1 , LOC100122874		biological_process (GO:0008150), DNA binding (GO:0003677), regulation of primary metabolic process (GO:0080090), negative regulation of nitrogen compound metabolic process (GO:0051172), regulation of cellular macromolecule biosynthetic process (GO:2000112), intracellular part (GO:0044424), negative regulation of biological process (GO:0048519), heterocyclic compound binding (GO:1901363), negative…	DNA methyltransferase 1-associated protein 1 (DMAP1) (PF05499.7)
serine/threonine-protein kinase grp	LOC100122897	NC_015867.2:2178074-2180445:-	Serine/threonine-protein kinase grp	grapes	XM_008204926.1	XP_008203148.1	LOC100122897, grapes, Serine/threonine-protein kinase grp , grp, NV14014	AAEL013066 (Aedes aegypti), ACEP18157 (Atta cephlotes), ENSG00000149554 (Homo sapiens), FBgn0261278 (Drosophila melanogaster), GB16086 (Apis mellifera), SINV16935 (Solenopsis invicta)	single organism signaling (GO:0044700), cellular component biogenesis (GO:0044085), protein kinase activity (GO:0004672), cellular metabolic process (GO:0044237), regulation of cell cycle process (GO:0010564), metabolic process (GO:0008152), female meiosis chromosome segregation (GO:0016321), histone methyltransferase activity (GO:0042054), macromolecular complex assembly (GO:0065003), regulation…	Protein kinase domain (PF00069.20)
serine/threonine-protein kinase GA29083	LOC100122907	NC_015867.2:2180732-2186022:+	Serine/threonine-protein kinase DCLK2	serine/threonine-protein kinase GA29083-like	XM_008204642.1, XM_008204640.1, XM_008204641.1, XM_008204637.1, XM_008204639.1, XM_008204638.1, XM_008204635.1, XM_008204632.1, XM_008204630.1, XM_008204633.1, XM_008204631.1, XM_008204634.1, XM_001606464.3	XP_008202864.1, XP_008202862.1, XP_008202863.1, XP_008202859.1, XP_008202861.1, XP_008202860.1, XP_008202857.1, XP_008202854.1, XP_008202852.1, XP_008202855.1, XP_008202853.1, XP_008202856.1, XP_001606514.1	serine/threonine-protein kinase GA29083-like, LOC100122907, NV14015, CG17528, Serine/threonine-protein kinase DCLK2	AAEL013173 (Aedes aegypti), ACEP12878 (Atta cephlotes), Aqu1.217189 (Amphimedon queenslandica), Aqu1.217190 (Amphimedon queenslandica), Aqu1.220131 (Amphimedon queenslandica), Aqu1.227533 (Amphimedon queenslandica), Aqu1.228018 (Amphimedon queenslandica), BGIBMGA007823 (Bombyx mori), ENSG00000170390 (Homo sapiens), ENSMUSG00000028078 (Mus musculus), FBgn0261387 (Drosophila melanogaster), GB12930 …	single organism signaling (GO:0044700), protein kinase activity (GO:0004672), cellular metabolic process (GO:0044237), non-membrane-bounded organelle (GO:0043228), metabolic process (GO:0008152), cytoskeletal protein binding (GO:0008092), biological_process (GO:0008150), cellular response to stimulus (GO:0051716), single-organism cellular process (GO:0044763), tubulin binding (GO:0015631), cellul…	Protein kinase domain (PF00069.20), Doublecortin (PF03607.12)
anaphase-promoting complex subunit 1	LOC100122916	NC_015867.2:2186265-2194601:-	Anaphase-promoting complex subunit 1	shattered	XM_008204643.1, XM_008204644.1	XP_008202865.1, XP_008202866.1	Anaphase-promoting complex subunit 1 , shtd, NV14016, LOC100122916, shattered	AAEL004064 (Aedes aegypti), ACEP23408 (Atta cephlotes), Aqu1.200376 (Amphimedon queenslandica), Aqu1.225230 (Amphimedon queenslandica), BGIBMGA008275 (Bombyx mori), BGIBMGA008276 (Bombyx mori), BGIBMGA008277 (Bombyx mori), ENSG00000153107 (Homo sapiens), ENSMUSG00000014355 (Mus musculus), FBgn0004391 (Drosophila melanogaster), GB19084 (Apis mellifera), GB49491 (Apis mellifera), SINV20929 (Solenop…	cellular metabolic process (GO:0044237), metabolic process (GO:0008152), biological_process (GO:0008150), mitotic cell cycle (GO:0000278), single-organism cellular process (GO:0044763), cellular macromolecule metabolic process (GO:0044260), single-multicellular organism process (GO:0044707), intracellular part (GO:0044424), mitotic cell cycle process (GO:1903047), protein polyubiquitination (GO:0…	Anaphase-promoting complex subunit 1 (PF12859.2)
solute carrier family 35 member F2-like	LOC100123002	NC_015867.2:2212912-2217933:+	Solute carrier family 35 member F1	uncharacterized LOC100123002	XM_008204652.1, XM_001606559.3, XM_008204655.1, XM_008204654.1, XM_008204653.1	XP_008202874.1, XP_001606609.2, XP_008202877.1, XP_008202876.1, XP_008202875.1	NV14022, uncharacterized LOC100123002, LOC100123002, Solute carrier family 35 member F1	ACEP18651 (Atta cephlotes), Aqu1.217351 (Amphimedon queenslandica), BGIBMGA011041 (Bombyx mori), ENSG00000196376 (Homo sapiens), ENSMUSG00000038602 (Mus musculus), GB16009 (Apis mellifera), GB55651 (Apis mellifera), SINV19002 (Solenopsis invicta), WBGene00022270 (Caenorhabditis elegans)	biological_process (GO:0008150), transport (GO:0006810), membrane (GO:0016020), cellular_component (GO:0005575), intrinsic component of membrane (GO:0031224), integral component of membrane (GO:0016021), localization (GO:0051179), establishment of localization (GO:0051234), membrane part (GO:0044425)	Eukaryotic protein of unknown function (DUF914) (PF06027.7)
origin recognition complex subunit 3	LOC100123111	NC_015867.2:2266454-2269873:+	origin recognition complex subunit 3. putative	origin recognition complex subunit 3-like	XM_008204668.1	XP_008202890.1	LOC100123111, NV14031, lat, origin recognition complex subunit 3-like, origin recognition complex subunit 3. putative	AAEL004328 (Aedes aegypti), ACEP17531 (Atta cephlotes), BGIBMGA000323 (Bombyx mori), ENSG00000135336 (Homo sapiens), ENSMUSG00000040044 (Mus musculus), FBgn0005654 (Drosophila melanogaster), GB11141 (Apis mellifera), GB44850 (Apis mellifera), SINV25592 (Solenopsis invicta), TC013076 (Tribolium castaneum)	chemosensory behavior (GO:0007635), cellular metabolic process (GO:0044237), non-membrane-bounded organelle (GO:0043228), metabolic process (GO:0008152), biological_process (GO:0008150), DNA binding (GO:0003677), single-organism cellular process (GO:0044763), microtubule cytoskeleton organization (GO:0000226), learning (GO:0007612), olfactory learning (GO:0008355), cellular macromolecule metaboli…	Origin recognition complex (ORC) subunit 3 N-terminus (PF07034.6)
homeobox protein extradenticle-like	LOC100123119	NC_015867.2:2270682-2272368:+	homeobox protein extradenticle	homeobox protein extradenticle-like	XM_001606678.3	XP_001606728.2	NV14032, exd, LOC100123119, homeobox protein extradenticle-like, homeobox protein extradenticle	AAEL012877 (Aedes aegypti), AAEL012879 (Aedes aegypti), ACEP27991 (Atta cephalotes), BGIBMGA007946 (Bombyx mori), FBgn0000611 (Drosophila melanogaster), GB51904 (Apis mellifera), SINV21415 (Solenopsis invicta), TC011311 (Tribolium castaneum)	gland development (GO:0048732), cytoplasm (GO:0005737), RNA polymerase II distal enhancer sequence-specific DNA binding transcription factor activity (GO:0003705), positive regulation of biosynthetic process (GO:0009891), cellular metabolic process (GO:0044237), metabolic process (GO:0008152), imaginal disc pattern formation (GO:0007447), protein import into nucleus (GO:0006606), peripheral nervo…	PBC domain (PF03792.8), Homeobox domain (PF00046.24)
probable cytochrome P450 4p3	LOC100123128	NC_015867.2:2274175-2293012:-	Cytochrome P450 4C1		XM_008204670.1, XM_008204672.1, XM_008204671.1, XM_008204669.1	XP_008202892.1, XP_008202894.1, XP_008202893.1, XP_008202891.1	Cyp4p1, Cyp4ac3, Cyp4p3, Cyp4ac1, CYP4AB16, Cytochrome P450 4C1 , Cyp4ac2, LOC100123128, Cyp4p2	AAEL013554 (Aedes aegypti), AAEL013555 (Aedes aegypti), AAEL013556 (Aedes aegypti), AAEL014019 (Aedes aegypti), AAEL014829 (Aedes aegypti), AAEL014830 (Aedes aegypti), AAEL015663 (Aedes aegypti), Aqu1.221375 (Amphimedon queenslandica), Aqu1.222407 (Amphimedon queenslandica), Aqu1.224816 (Amphimedon queenslandica), BGIBMGA003683 (Bombyx mori), BGIBMGA007168 (Bombyx mori), BGIBMGA007195 (Bombyx mor…	cellular metabolic process (GO:0044237), metabolic process (GO:0008152), monooxygenase activity (GO:0004497), biological_process (GO:0008150), cellular response to stimulus (GO:0051716), single-organism cellular process (GO:0044763), oxidoreductase activity, acting on paired donors, with incorporation or reduction of molecular oxygen (GO:0016705), insecticide metabolic process (GO:0017143), intra…	Cytochrome P450 (PF00067.17)
uncharacterized	LOC100313527	NC_015869.2:10304880-10307087:+	pygopus protein	uncharacterized LOC100313527	NM_001167791.1	NP_001161263.1	NV31776, pygopus protein , LOC100313527, uncharacterized LOC100313527	Aqu1.223824 (Amphimedon queenslandica)	transition metal ion binding (GO:0046914), zinc ion binding (GO:0008270), metal ion binding (GO:0046872), binding (GO:0005488), molecular_function (GO:0003674), protein binding (GO:0005515), cation binding (GO:0043169), ion binding (GO:0043167)	PHD-finger (PF00628.24)
tctex1 domain-containing protein B (aka TctexB)	LOC100463506	NC_015869.2:10546747-10547367:-	LOC100463506		XM_003427989.1	XP_003428037.1	LOC100463506			Tctex-1 family (PF03645.8)
uncharacterized LOC100677905	LOC100677905	NC_015867.2:2294400-2329471:+	LOC100677905	uncharacterized LOC100677905	XM_008204673.1, XM_003425498.2	XP_008202895.1, XP_003425546.2	NV22819, LOC100677905, mt:ND5, uncharacterized LOC100677905	ACEP18658 (Atta cephlotes), Aqu1.227614 (Amphimedon queenslandica), BGIBMGA010982 (Bombyx mori), FBgn0013684 (Drosophila melanogaster), GB55654 (Apis mellifera), SINV18871 (Solenopsis invicta), TC010230 (Tribolium castaneum), WBGene00219297 (Caenorhabditis elegans)	cytoplasm (GO:0005737), mitochondrial respiratory chain complex I (GO:0005747), cellular metabolic process (GO:0044237), metabolic process (GO:0008152), generation of precursor metabolites and energy (GO:0006091), ribose phosphate metabolic process (GO:0019693), mitochondrial inner membrane (GO:0005743), biological_process (GO:0008150), single-organism cellular process (GO:0044763), ribonucleosid…
neuropeptides capa receptor-like	LOC100678058	NC_015867.2:5975623-5976912:+	Neuropeptides capa receptor				LOC100120473, LOC100678058, Neuropeptides capa receptor	WBGene00016747 (Caenorhabditis elegans), WBGene00017176 (Caenorhabditis elegans), WBGene00019616 (Caenorhabditis elegans)	single organism signaling (GO:0044700), cell surface receptor signaling pathway (GO:0007166), biological_process (GO:0008150), cellular response to stimulus (GO:0051716), single-organism cellular process (GO:0044763), neurotransmitter receptor activity (GO:0030594), receptor activity (GO:0004872), cell-cell signaling (GO:0007267), regulation of cellular process (GO:0050794), intrinsic component o…
thyrotropin-releasing hormone receptor-like	LOC100678089	NC_015867.2:5977428-5981877:+	LOC100678089		XM_003424939.2	XP_003424987.2	LOC100678089			7 transmembrane receptor (rhodopsin family) (PF00001.16)
lymphocyte antigen 6C2	LOC100678217	NC_015871.2:7711432-7768896:-	LOC100678217	uncharacterized LOC100678217	XM_003426645.2	XP_003426693.1	NV22269, uncharacterized LOC100678217, CG8861, LOC100678217	ACEP23128 (Atta cephlotes), BGIBMGA002320 (Bombyx mori), ENSMUSG00000079018 (Mus musculus), FBgn0037676 (Drosophila melanogaster), GB54690 (Apis mellifera)	extracellular region (GO:0005576), cellular_component (GO:0005575)
SH3 domain-containing protein 21-like	LOC100678629	NC_015867.2:6375069-6378386:+	LOC100678629	uncharacterized LOC100678629	XM_008215865.1, XM_008215858.1, XM_008215876.1, XM_008215868.1, XM_008215871.1	XP_008214087.1, XP_008214080.1, XP_008214098.1, XP_008214090.1, XP_008214093.1	NV22645, uncharacterized LOC100678629, LOC100678629
uncharacterized	LOC100678650	NC_015868.2:758624-781279:-	LOC100678650	uncharacterized LOC100678650	XM_003424651.2	XP_003424699.1	NV25559, CG15673, uncharacterized LOC100678650, LOC100678650	AAEL006277 (Aedes aegypti), ACEP23632 (Atta cephlotes), FBgn0034639 (Drosophila melanogaster), GB18653 (Apis mellifera), GB53655 (Apis mellifera), SINV12965 (Solenopsis invicta), TC011883 (Tribolium castaneum)
protein lifeguard 2-like	LOC100679041	NC_015867.2:2134438-2136041:+	FAS apoptotic inhibitory molecule 2		XM_008204610.1, XM_008204611.1	XP_008202832.1, XP_008202833.1	LOC100679041, FAS apoptotic inhibitory molecule 2	ACEP14086 (Atta cephlotes), Aqu1.223725 (Amphimedon queenslandica), GB41120 (Apis mellifera), WBGene00006470 (Caenorhabditis elegans), WBGene00009580 (Caenorhabditis elegans), WBGene00021537 (Caenorhabditis elegans)	membrane (GO:0016020), cellular_component (GO:0005575), intrinsic component of membrane (GO:0031224), integral component of membrane (GO:0016021), membrane part (GO:0044425)	Inhibitor of apoptosis-promoting Bax1 (PF01027.15)
zinc finger protein Xfin-like	LOC100679111	NC_015868.2:1233347-1239596:-	Zinc finger protein 845	zinc finger protein Xfin-like	XM_003427077.1, XM_008211140.1	XP_003427125.1, XP_008209362.1	LOC100679111, NV23068, zinc finger protein Xfin-like, Zinc finger protein 845 , CG18011	ACEP18942 (Atta cephalotes), ACEP18943 (Atta cephlotes), FBgn0033491 (Drosophila melanogaster), GB12664 (Apis mellifera), GB53737 (Apis mellifera), SINV17674 (Solenopsis invicta), SINV17759 (Solenopsis invicta)	intracellular part (GO:0044424), heterocyclic compound binding (GO:1901363), transition metal ion binding (GO:0046914), membrane-bounded organelle (GO:0043227), cellular_component (GO:0005575), nucleic acid binding (GO:0003676), zinc ion binding (GO:0008270), metal ion binding (GO:0046872), intracellular (GO:0005622), binding (GO:0005488), organelle (GO:0043226), cell (GO:0005623), organic cyclic…	Zinc-finger of C2H2 type (PF12874.2), Zinc-finger associated domain (zf-AD) (PF07776.10), C2H2-type zinc finger (PF13894.1), C2H2 type zinc-finger (2 copies) (PF12756.2), Zinc finger, C2H2 type (PF00096.21)
uncharacterized	LOC100679276	NC_015869.2:10549534-10556344:-	LOC100679276	uncharacterized LOC100679276	XM_003427976.2	XP_003428024.1	NV23113, uncharacterized LOC100679276, LOC100679276	AAEL005948 (Aedes aegypti), ACEP19911 (Atta cephlotes), GB11111 (Apis mellifera), GB55603 (Apis mellifera), SINV20452 (Solenopsis invicta), TC008048 (Tribolium castaneum)
uncharacterized	LOC100679702	NW_001815126.1:1702288-1806444:-	LOC100679702		XM_008203647.1, XM_008203648.1, XM_008203649.1	XP_008201869.1, XP_008201870.1, XP_008201871.1	klar, LOC100679702	AAEL001296 (Aedes aegypti), ACEP14947 (Atta cephlotes), BGIBMGA010174 (Bombyx mori), BGIBMGA010176 (Bombyx mori), BGIBMGA010177 (Bombyx mori), FBgn0001316 (Drosophila melanogaster), GB30140 (Apis mellifera), GB52109 (Apis mellifera), SINV11824 (Solenopsis invicta), SINV11851 (Solenopsis invicta), SINV11873 (Solenopsis invicta), TC001444 (Tribolium castaneum)	tube formation (GO:0035148), cytoplasm (GO:0005737), cellular metabolic process (GO:0044237), non-membrane-bounded organelle (GO:0043228), nuclear migration (GO:0007097), metabolic process (GO:0008152), cytoskeletal protein binding (GO:0008092), ribose phosphate metabolic process (GO:0019693), sensory organ morphogenesis (GO:0090596), biological_process (GO:0008150), generation of neurons (GO:004…	Nuclear envelope localisation domain (PF10541.4)
putative odorant binding protein 58 (aka OBP58)	LOC100679743	NW_001820749.1:2445020-2446189:-	OBP58	putative odorant binding protein 58	XM_003428115.2	XP_003428163.1	LOC100679743, putative odorant binding protein 58, NV25629, OBP58	AAEL017384 (Aedes aegypti), ENSMUSG00000096223 (Mus musculus)	binding (GO:0005488), odorant binding (GO:0005549), molecular_function (GO:0003674)	PBP/GOBP family (PF01395.17)
uncharacterized	LOC100679789	NC_015869.2:7627453-7637776:+	LOC100679789		XM_008215256.1, XM_008215259.1, XM_008215255.1, XM_008215257.1, XM_003424162.2, XM_008215260.1	XP_008213478.1, XP_008213481.1, XP_008213477.1, XP_008213479.1, XP_003424210.1, XP_008213482.1	LOC100679789	Aqu1.227959 (Amphimedon queenslandica), GB10824 (Apis mellifera), GB52502 (Apis mellifera), TC001787 (Tribolium castaneum), WBGene00044559 (Caenorhabditis elegans)
uncharacterized	LOC100679820	NC_015868.2:1272509-1276869:+	LOC100679820				LOC100679820
putative odorant binding protein 62 (aka OBP62)	LOC100679879	NW_001820749.1:2451561-2453447:-	OBP62	putative odorant binding protein 62	XM_003428116.2	XP_003428164.1	putative odorant binding protein 62, NV25628, OBP62, LOC100679879	TC008162 (Tribolium castaneum)	binding (GO:0005488), odorant binding (GO:0005549), molecular_function (GO:0003674)	PBP/GOBP family (PF01395.17)
turripeptide Gsp9.3-like	LOC100680022	NC_015867.2:6094751-6095399:+	LOC100680056		XM_003424927.2	XP_003424975.1	LOC100680022, LOC100680056		peptidase activity (GO:0008233), peptidase regulator activity (GO:0061134), negative regulation of protein maturation (GO:1903318), negative regulation of peptidase activity (GO:0010466), metabolic process (GO:0008152), catalytic activity (GO:0003824), binding (GO:0005488), macromolecule metabolic process (GO:0043170), protein metabolic process (GO:0019538), biological_process (GO:0008150), regul…	Kazal-type serine protease inhibitor domain (PF00050.16)
uncharacterized	LOC100680050	NC_015868.2:2076255-2078940:-	LOC100680050		XM_003427048.2	XP_003427096.1	LOC100680050
low-density lipoprotein receptor-related protein 4-like	LOC100680051	NC_015869.2:5517936-5519765:-	GM11364		XM_008212287.1	XP_008210509.1	GM11364 , LOC100680051		cytoplasm (GO:0005737), metabolic process (GO:0008152), biological_process (GO:0008150), steroid metabolic process (GO:0008202), plasma membrane (GO:0005886), transport (GO:0006810), intracellular part (GO:0044424), membrane (GO:0016020), single-organism process (GO:0044699), membrane-bounded organelle (GO:0043227), lipid metabolic process (GO:0006629), cellular_component (GO:0005575), cell perip…	Low-density lipoprotein receptor domain class A (PF00057.13)
turripeptide Pal9.2-like	LOC100680056	NC_015867.2:6096048-6096899:+	LOC100680056		XM_003424928.2	XP_003424976.1	LOC100680022, LOC100680056		peptidase activity (GO:0008233), negative regulation of protein maturation (GO:1903318), negative regulation of peptidase activity (GO:0010466), metabolic process (GO:0008152), biological_process (GO:0008150), regulation of endopeptidase activity (GO:0052548), regulation of primary metabolic process (GO:0080090), negative regulation of catalytic activity (GO:0043086), serine-type endopeptidase in…	Kazal-type serine protease inhibitor domain (PF00050.16)
kinectin-like	LOC100680081	NC_015868.2:2082388-2084922:-	LOC100680081	uncharacterized LOC100680081	XM_008211298.1, XM_003427049.2, XM_008211297.1, XM_008211304.1, XM_008211301.1, XM_008211299.1, XM_008211303.1, XM_008211300.1, XM_008211302.1	XP_008209520.1, XP_003427097.1, XP_008209519.1, XP_008209526.1, XP_008209523.1, XP_008209521.1, XP_008209525.1, XP_008209522.1, XP_008209524.1	uncharacterized LOC100680081, LOC100680081, NV23058, Nuf2	ACEP12691 (Atta cephlotes), FBgn0031886 (Drosophila melanogaster), GB10048 (Apis mellifera), GB46441 (Apis mellifera), SINV15352 (Solenopsis invicta)	non-membrane-bounded organelle (GO:0043228), biological_process (GO:0008150), mitotic cell cycle (GO:0000278), chromosome segregation (GO:0007059), single-organism cellular process (GO:0044763), microtubule cytoskeleton organization (GO:0000226), organelle localization (GO:0051640), single-multicellular organism process (GO:0044707), intracellular part (GO:0044424), spindle organization (GO:00070…	Nuf2 family (PF03800.9)
ras-related and estrogen-regulated growth inhibitor-like	LOC100680112	NC_015867.2:6110290-6141781:-	Ras-related and estrogen-regulated growth inhibitor		XM_003424929.2	XP_003424977.1	LOC100121183, Ras-related and estrogen-regulated growth inhibitor , LOC100680112	AAEL011522 (Aedes aegypti), ACEP12601 (Atta cephlotes), Aqu1.214248 (Amphimedon queenslandica), BGIBMGA002446 (Bombyx mori), BGIBMGA002448 (Bombyx mori), GB12993 (Apis mellifera), SINV15488 (Solenopsis invicta), TC011238 (Tribolium castaneum), WBGene00022123 (Caenorhabditis elegans)	single organism signaling (GO:0044700), cellular metabolic process (GO:0044237), metabolic process (GO:0008152), GTP catabolic process (GO:0006184), guanosine-containing compound metabolic process (GO:1901068), GTPase activity (GO:0003924), ribose phosphate metabolic process (GO:0019693), biological_process (GO:0008150), cellular response to stimulus (GO:0051716), DNA binding (GO:0003677), single…	Ras family (PF00071.17)
histone acetyltransferase p300-like	LOC100680172	NC_015869.2:16583704-16606479:+	LOC100680172	uncharacterized LOC100680172	XM_008218294.1, XM_008218292.1, XM_008218302.1, XM_008218293.1, XM_008218298.1, XM_008218296.1, XM_008218297.1, XM_008218300.1, XM_008218301.1, XM_008218295.1, XM_008218299.1, XM_003424004.2	XP_008216516.1, XP_008216514.1, XP_008216524.1, XP_008216515.1, XP_008216520.1, XP_008216518.1, XP_008216519.1, XP_008216522.1, XP_008216523.1, XP_008216517.1, XP_008216521.1, XP_003424052.1	LOC100680172, NV20070, uncharacterized LOC100680172		single organism signaling (GO:0044700), cytoplasm (GO:0005737), positive regulation of biosynthetic process (GO:0009891), cellular metabolic process (GO:0044237), non-membrane-bounded organelle (GO:0043228), metabolic process (GO:0008152), positive regulation of molecular function (GO:0044093), biological_process (GO:0008150), cellular response to stimulus (GO:0051716), DNA binding (GO:0003677), …	TAZ zinc finger (PF02135.11)
ankyrin repeat and FYVE domain-containing protein 1-like	LOC100680187	NC_015867.2:2207928-2210411:-	LOC100680187	putative ankyrin repeat protein RF_0381-like	XM_008204647.1, XM_003425491.2	XP_008202869.1, XP_003425539.1	NV22745, LOC100680187, putative ankyrin repeat protein RF_0381-like		binding (GO:0005488), molecular_function (GO:0003674), protein binding (GO:0005515)	Ankyrin repeats (3 copies) (PF12796.2), Ankyrin repeats (many copies) (PF13857.1), PRANC domain (PF09372.5)
nose resistant to fluoxetine protein 6-like	LOC100680204	NC_015869.2:16662327-16666900:-	Nose resistant to fluoxetine protein 6	nose resistant to fluoxetine protein 6-like	XM_003424005.2, XM_008218313.1	XP_003424053.1, XP_008216535.1	LOC100680204, Nose resistant to fluoxetine protein 6 , nose resistant to fluoxetine protein 6-like, NV20056	ACEP17781 (Atta cephalotes), ACEP18386 (Atta cephlotes), ACEP18388 (Atta cephalotes), ACEP24074 (Atta cephalotes), Aqu1.225057 (Amphimedon queenslandica), Aqu1.225059 (Amphimedon queenslandica), GB11812 (Apis mellifera), GB49078 (Apis mellifera), SINV20341 (Solenopsis invicta), SINV24040 (Solenopsis invicta), SINV24739 (Solenopsis invicta), TC004826 (Tribolium castaneum), WBGene00003813 (Caenorha…	metabolic process (GO:0008152), biological_process (GO:0008150), transferase activity, transferring acyl groups other than amino-acyl groups (GO:0016747), transferase activity (GO:0016740), transferase activity, transferring acyl groups (GO:0016746), catalytic activity (GO:0003824), molecular_function (GO:0003674)	Acyltransferase family (PF01757.17)
uncharacterized	LOC100680252	NW_001820504.1:4029-6194:-	LOC100680252	uncharacterized LOC100680252	XM_003427900.2	XP_003427948.1	LOC100680252, uncharacterized LOC100680252, NV25518	GB17832 (Apis mellifera)
uncharacterized LOC103315488	LOC103315488	NC_015867.2:2137180-2138056:+	LOC103315488		XM_008204609.1	XP_008202831.1	LOC103315488
SET and MYND domain-containing protein 4-like	LOC103315491	NC_015867.2:2223361-2225915:-	LOC103315491		XM_008204650.1	XP_008202872.1	LOC103315491			SET domain (PF00856.23)
SET and MYND domain-containing protein DDB_G0273591-like	LOC103315492	NC_015867.2:2220074-2222092:-	LOC103315492		XM_008204651.1	XP_008202873.1	LOC103315492			SET domain (PF00856.23)
uncharacterized LOC103315529	LOC103315529	NC_015867.2:2163351-2164202:+	LOC103315529		XM_008204925.1	XP_008203147.1	LOC103315529
uncharacterized	LOC103316644	NC_015868.2:2080735-2082310:-	LOC103316644		XM_008211295.1	XP_008209517.1	LOC103316644			Ecdysteroid kinase (PF02958.15)
low-density lipoprotein receptor-related protein 1-like	LOC103316769	NC_015869.2:5505544-5509602:-	LOC103316769		XM_008212286.1	XP_008210508.1	LOC103316769			Low-density lipoprotein receptor domain class A (PF00057.13)
uncharacterized	LOC103317513	NC_015867.2:6018501-6020081:+	LOC103317513				LOC103317513
uncharacterized	LOC103317710	NW_001820749.1:1054540-1061541:-	LOC103317710		XM_008216415.1	XP_008214637.1	LOC103317710
lipase member H-like	LOC103317733	NW_001820749.1:2419940-2431951:-	LOC103317733		XM_008216521.1	XP_008214743.1	LOC103317733			Lipase (PF00151.14)
uncharacterized	LOC103317734	NW_001820749.1:2366860-2367329:+	LOC103317734		XM_008216522.1	XP_008214744.1	LOC103317734
keratin-associated protein 10-4-like	LOC103317737	NW_001814903.1:51507-53012:-	LOC103317737		XM_008216529.1	XP_008214751.1	LOC103317737
larval cuticle protein A1A-like	LOC103317772	NW_001820749.1:2370418-2375624:-	LOC103317772		XM_008216769.1	XP_008214991.1	LOC103317772
uncharacterized (aka OBP63)	LOC103317773	NW_001820749.1:2453746-2461132:-	LOC103317773		XM_008216770.1	XP_008214992.1	LOC103317773			PBP/GOBP family (PF01395.17)
uncharacterized	LOC103317930	NC_015869.2:16605441-16612154:-	LOC103317930				LOC103317930
putative ankyrin repeat protein RF_0381	LOC103317951	NC_015869.2:16668091-16669701:+	LOC103317951		XM_008218485.1	XP_008216707.1	LOC103317951			Ankyrin repeats (3 copies) (PF12796.2), Ankyrin repeats (many copies) (PF13637.1), Ankyrin repeat (PF00023.25)
uncharacterized	LOC103318116	NC_015868.2:18927765-18931172:-	LOC103318116				LOC103318116
odorant receptor 105	Or105	NC_015869.2:15835209-15836867:-	odorant receptor 102. sym:Or102		NM_001170930.1	NP_001164401.1	Or102, odorant receptor 103. sym:Or103 , odorant receptor 102. sym:Or102 , Or105, Or94a, odorant receptor 105. sym:Or105 , Or103	AAEL003369 (Aedes aegypti), AAEL003395 (Aedes aegypti), AAEL015310 (Aedes aegypti), AAEL016970 (Aedes aegypti), Aqu1.202184 (Amphimedon queenslandica), BGIBMGA005741 (Bombyx mori), ENSMUSG00000069280 (Mus musculus), FBgn0039033 (Drosophila melanogaster)	single organism signaling (GO:0044700), detection of chemical stimulus (GO:0009593), neurological system process (GO:0050877), binding (GO:0005488), detection of stimulus (GO:0051606), biological_process (GO:0008150), detection of stimulus involved in sensory perception (GO:0050906), cellular response to stimulus (GO:0051716), single-organism cellular process (GO:0044763), multicellular organisma…	7tm Odorant receptor (PF02949.15)
serine protease 133	SP133	NC_015867.2:2210496-2211723:-	Chymotrypsin-2	serine protease 133	NM_001172600.1	NP_001166071.1	serine protease 133, NV14021, Chymotrypsin-2 , SP133	AAEL002177 (Aedes aegypti), AAEL006627 (Aedes aegypti), AAEL007938 (Aedes aegypti), AAEL009680 (Aedes aegypti), AAEL011913 (Aedes aegypti), AAEL011916 (Aedes aegypti), AAEL011917 (Aedes aegypti), AAEL011919 (Aedes aegypti), AAEL011920 (Aedes aegypti), AAEL011922 (Aedes aegypti), AAEL011929 (Aedes aegypti), AAEL015294 (Aedes aegypti), AAEL017475 (Aedes aegypti), ACEP25848 (Atta cephalotes), SINV10…	peptidase activity (GO:0008233), metabolic process (GO:0008152), biological_process (GO:0008150), peptidase activity, acting on L-amino acid peptides (GO:0070011), organic substance metabolic process (GO:0071704), catalytic activity (GO:0003824), macromolecule metabolic process (GO:0043170), protein metabolic process (GO:0019538), serine-type peptidase activity (GO:0008236), primary metabolic pro…	Trypsin (PF00089.21)
THO complex 4 (aka Aly)	Thoc4	NC_015867.2:6382881-6385586:-	Isoleucyl-tRNA synthetase. mitochondrial	isoleucyl-tRNA synthetase 2, mitochondrial, THO complex 4	NM_001129822.1, XM_008215153.1	NP_001123294.1, XP_008213375.1	CG5414, isoleucyl-tRNA synthetase 2, mitochondrial, THO complex 4, NV18052, THO complex subunit 4-A , Iars2, Thoc4, Iars2, Thoc4, Isoleucyl-tRNA synthetase. mitochondrial	AAEL009917 (Aedes aegypti), ACEP17639 (Atta cephlotes), Aqu1.218780 (Amphimedon queenslandica), BGIBMGA014150 (Bombyx mori), ENSG00000067704 (Homo sapiens), ENSMUSG00000026618 (Mus musculus), FBgn0036569 (Drosophila melanogaster), GB13728 (Apis mellifera), GB52676 (Apis mellifera), TC002282 (Tribolium castaneum), WBGene00002153 (Caenorhabditis elegans)	posttranscriptional regulation of gene expression (GO:0010608), cytoplasm (GO:0005737), cellular metabolic process (GO:0044237), metabolic process (GO:0008152), tRNA aminoacylation for protein translation (GO:0006418), aminoacyl-tRNA ligase activity (GO:0004812), biological_process (GO:0008150), regulation of primary metabolic process (GO:0080090), single-organism cellular process (GO:0044763), c…	RNA recognition motif. (a.k.a. RRM, RBD, or RNP domain) (PF00076.17), C-terminal duplication domain of Friend of PRMT1 (PF13865.1)
transfer RNA glycine (anticodon GCC)	Trnag-gcc	NC_015869.2:15829397-15829467:+	Trnag-gcc				Trnag-gcc
transfer RNA serine (anticodon CGA)	Trnas-cga	NC_015867.2:2130964-2131045:+	Trnas-cga				Trnas-cga
yellow-e (aka Nv-yellow-e)	Y-e	NC_015869.2:4804781-4809352:-	yellow protein	yellow-e	XM_008212059.1, NM_001161513.1	XP_008210281.1, NP_001154985.1	yellow protein , NV16650, yellow-e, Y-e	AAEL011699 (Aedes aegypti), ACEP27820 (Atta cephlotes), BGIBMGA007253 (Bombyx mori), FBgn0041711 (Drosophila melanogaster), GB17225 (Apis mellifera), GB47129 (Apis mellifera), GB55202 (Apis mellifera), SINV25939 (Solenopsis invicta), TC006227 (Tribolium castaneum)	biological_process (GO:0008150), cellular_component (GO:0005575), molecular_function (GO:0003674)	Major royal jelly protein (PF03022.11)
