# Supplementary material for: Regulatory and sequence evolution in response to selection for improved associative learning ability in Nasonia vitripennis
Source: BMC Genomics. 2018 Dec 10;19:892. doi: 10.1186/s12864-018-5310-9 (PMC6288879; doi:10.1186/s12864-018-5310-9)
Supplement: Supplementary file 6 — Table S4. Sequencing information for each of the eight pooled RNA libraries. (XLSX 40 kb) [file 12864_2018_5310_MOESM6_ESM.xlsx]

## Sheet: Sheet1
selection line	raw read counts	reads trimmed (%)	reads mapped (%)
control A	103890490	95	76							s
control B	97422184	95	77
control C	99167422	95	76
control D	98594597	95	76
selected A	106776692	95	77
selected B	101763343	95	76
selected C	97162030	95	76
selected D	101681745	95	75
