# Supplementary material for: Regulatory and sequence evolution in response to selection for improved associative learning ability in Nasonia vitripennis
Source: BMC Genomics. 2018 Dec 10;19:892. doi: 10.1186/s12864-018-5310-9 (PMC6288879; doi:10.1186/s12864-018-5310-9)
Supplement: Supplementary file 10 — Table S5. Evolved expression changes in response to selection for increased learning ability. Thirty-six transcripts, expressed from 34 loci, showed evidence of evolved expression regulation that was consistent across four replicate pairs of lines, as identified by three complementary methods (see Methods and Additional file 8). Transcripts are in order of increasing Fold Change, with high Fold Change indicating elevated expression in lines selected for increased learning ability. Table includes Fold Change per line pair, test statistics for edgeR, correlations with PC 6 and χ2 tests within line pairs, chromosomal positions of transcripts, and additional annotations from NCBI and WaspAtlas [43]. (XLSX 53 kb) [file 12864_2018_5310_MOESM10_ESM.xlsx]

## Sheet: clean_table_for_suppl_mat
gene.name	gene.accession	transcript.GenBank.accession	mean.log2FC	mean.log2CPM	log2FC.A	log2FC.B	log2FC.C	log2FC.D	edgeR.Likelihood_Ratio	edgeR.Pvalue	edgeR.fdr	PC6.pearsons.rho	PC6.F	PC6.unadj.p	linesA.pairwise.chisq.pval	linesB.pairwise.chisq.pval	linesC.pairwise.chisq.pval	linesD.pairwise.chisq.pval	linesA.pairwise.chisq	linesB.pairwise.chisq	linesC.pairwise.chisq	linesD.pairwise.chisq	all_lines.pairwise.chisq.maxp	all_lines.pairwise.chisq.maxp.fdr	chromosome	start_pos	stop_pos	strand	ncbi_fasta_transcript_name	Waspatlas_Gene name	Waspatlas_Gene description	Waspatlas_Orthologs	Waspatlas_Annotated GO terms	Waspatlas_Predicted PFAM domains
Rho GTPase-activating protein	LOC100118685	XM_008205242.1	-2.99403	1.50259	-2.05157	-3.48707	-3.89951	-2.53798	131.261	2.17062e-30	3.69157e-26	0.800833	24.1255	0.00267891	1.17352e-56	5.42603e-160	1.7332e-218	3.66645e-77	251.582	726.402	995.47	345.697	1.17352e-56	2.7991e-54	NC_015869.2	23889285	23898312	+	uncharacterized LOC100118685 (LOC100118685), transcript variant X3, mRNA	Rho GTPase-activating protein	uncharacterized LOC100118685, acyl-CoA Delta(11) desaturase-like	AAEL003203 (Aedes aegypti), AAEL018248 (Aedes aegypti), ACEP14108 (Atta cephlotes), BGIBMGA010121 (Bombyx mori), BGIBMGA010365 (Bombyx mori), ENSG00000099194 (Homo sapiens), ENSMUSG00000037071 (Mus musculus), FBgn0036518 (Drosophila melanogaster), GB11969 (Apis mellifera), SINV20170 (Solenopsis invicta), TC007566 (Tribolium castaneum), WBGene00001399 (Caenorhabditis elegans), WBGene00007064 (Caen…	regulation of cellular process (GO:0050794), single organism signaling (GO:0044700), membrane (GO:0016020), organic acid biosynthetic process (GO:0016053), oxidoreductase activity, acting on paired donors, with oxidation of a pair of donors resulting in the reduction of molecular oxygen to two molecules of water (GO:0016717), intrinsic component of membrane (GO:0031224), single-organism process (…	RhoGAP domain (PF00620.22)
molybdenum cofactor biosynthesis protein 1	LOC100118555	XM_008212104.1	-2.62446	1.35422	-2.89639	-2.56032	-2.18237	-2.85878	66.0328	4.4349e-16	1.88561e-12	0.65423	11.3526	0.0150544	6.45093e-114	1.60207e-77	1.1701e-56	4.21366e-108	514.562	347.348	251.588	487.836	1.1701e-56	2.7991e-54	NC_015869.2	4168096	4171267	-	molybdenum cofactor biosynthesis protein 1 (LOC100118555), transcript variant X3, mRNA	molybdenum cofactor biosynthesis protein 1	molybdenum cofactor biosynthesis protein 1-like	AAEL000126 (Aedes aegypti), ACEP21548 (Atta cephlotes), Aqu1.211189 (Amphimedon queenslandica), Aqu1.223581 (Amphimedon queenslandica), BGIBMGA009187 (Bombyx mori), ENSG00000124615 (Homo sapiens), ENSMUSG00000064120 (Mus musculus), FBgn0263241 (Drosophila melanogaster), GB11214 (Apis mellifera), GB55466 (Apis mellifera), TC000610 (Tribolium castaneum), WBGene00009885 (Caenorhabditis elegans)	cofactor biosynthetic process (GO:0051188), molybdopterin cofactor metabolic process (GO:0043545), molybdopterin cofactor biosynthetic process (GO:0032324), macromolecular complex (GO:0032991), Mo-molybdopterin cofactor biosynthetic process (GO:0006777), biosynthetic process (GO:0009058), cell (GO:0005623), cellular metabolic process (GO:0044237), phosphate-containing compound metabolic process (…	Molybdenum Cofactor Synthesis C (PF06463.8), Radical SAM superfamily (PF04055.16), MoaC family (PF01967.16)
uncharacterised protein (LOC100679965)	LOC100679965	XM_008216564.1	-2.57477	1.28748	-3.67904	-3.66037	0.000203762	-2.95986	110.928	6.13541e-26	5.21725e-22	0.281934	2.35578	0.175721	2.87569e-207	3.46869e-182	1	3.15726e-108	943.854	828.48	3.30799e-24	488.412	1	1	NW_001820749.1	2619180	2622494	+	uncharacterized LOC100679965 (LOC100679965), transcript variant X3, mRNA	LOC100679965	uncharacterized LOC100679965	ACEP27401 (Atta cephlotes), ENSG00000118492 (Homo sapiens), GB13907 (Apis mellifera), GB54428 (Apis mellifera), SINV21132 (Solenopsis invicta), SINV21137 (Solenopsis invicta)
circadian locomoter output cycles protein kaput	LOC100114103	XM_008216217.1	-2.20414	1.99398	-0.0727346	-3.05202	-2.34967	-3.34212	22.6738	1.91971e-06	0.00148402	0.463538	5.18439	0.0630652	0.0153781	1.04338e-114	2.30115e-65	2.36989e-145	5.87263	518.199	291.536	659.079	0.0153781	0.0860897	NW_001820688.1	7059	13304	-	circadian locomoter output cycles protein kaput (LOC100114103), transcript variant X3, mRNA	Neuronal PAS domain-containing protein	uncharacterized LOC100678270	AAEL012562 (Aedes aegypti), ACEP20954 (Atta cephlotes), Aqu1.211840 (Amphimedon queenslandica), Aqu1.212588 (Amphimedon queenslandica), Aqu1.212589 (Amphimedon queenslandica), ENSG00000170485 (Homo sapiens), ENSMUSG00000026077 (Mus musculus), FBgn0023076 (Drosophila melanogaster), GB17107 (Apis mellifera), GB48028 (Apis mellifera), SINV10534 (Solenopsis invicta), TC000088 (Tribolium castaneum)	single organism signaling (GO:0044700), cytoplasm (GO:0005737), positive regulation of biosynthetic process (GO:0009891), cellular metabolic process (GO:0044237), metabolic process (GO:0008152), regulation of circadian sleep/wake cycle, sleep (GO:0045187), biological_process (GO:0008150), cellular response to stimulus (GO:0051716), DNA binding (GO:0003677), regulation of primary metabolic process…	PAS fold (PF00989.19), Helix-loop-helix DNA-binding domain (PF00010.21), PAS domain (PF14598.1)
serine/threonine-protein kinase MST4	LOC100121999	XM_008213253.1	-2.16199	1.54777	-1.10837	-2.56584	-3.35693	-1.61684	24.7573	6.50217e-07	0.000552912	0.689764	13.3401	0.0106755	4.80141e-37	7.13485e-78	1.2465e-145	6.14489e-34	161.704	348.961	660.362	147.486	6.14489e-34	8.22216e-32	NC_015870.2	3378231	3432099	+	serine/threonine-protein kinase MST4 (LOC100121999), transcript variant X4, mRNA	STE20/SPS1-related proline-alanine-rich protein kinase	serine/threonine-protein kinase 25-like	AAEL000589 (Aedes aegypti), ACEP21352 (Atta cephlotes), Aqu1.228539 (Amphimedon queenslandica), BGIBMGA006001 (Bombyx mori), ENSG00000115694 (Homo sapiens), ENSMUSG00000026277 (Mus musculus), FBgn0086736 (Drosophila melanogaster), GB10792 (Apis mellifera), GB50672 (Apis mellifera), SINV11641 (Solenopsis invicta), TC014767 (Tribolium castaneum), WBGene00001526 (Caenorhabditis elegans)	single organism signaling (GO:0044700), protein kinase activity (GO:0004672), cellular metabolic process (GO:0044237), metabolic process (GO:0008152), biological_process (GO:0008150), cellular response to stimulus (GO:0051716), single-organism cellular process (GO:0044763), cellular macromolecule metabolic process (GO:0044260), protein serine/threonine kinase activity (GO:0004674), phosphorylatio…	Protein kinase domain (PF00069.20)
uncharacterized protein (LOC100678681)	LOC100678681	XM_003425395.2	-2.07565	2.50412	-0.205692	-4.70479	-3.21312	-0.179007	6.30867	0.0120149	0.832383	0.625263	10.0112	0.0194648	3.78002e-06	0	4.65333e-137	0.133059	21.3733	1835.52	620.947	2.25645	0.133059	0.429495	NW_001815337.1	24175	30580	-	uncharacterized LOC100678681 (LOC100678681), mRNA	LOC100678681	uncharacterized LOC100678621, uncharacterized LOC100678681	SINV12171 (Solenopsis invicta), SINV25122 (Solenopsis invicta)
cytochrome b5 reductase 4	LOC100117767	XM_008209788.1	-2.05339	2.52141	-0.46058	-2.90407	-0.813264	-4.03563	6.80336	0.00909867	0.736862	0.195862	1.46141	0.272179	1.60628e-12	3.66633e-102	1.85496e-34	7.603e-244	49.9141	460.541	149.866	1112.14	1.60628e-12	6.03563e-11	NC_015868.2	7942302	7949875	+	cytochrome b5 reductase 4 (LOC100117767), transcript variant X1, mRNA	Cytochrome b5 reductase 4	cytochrome b5 reductase 4-like	AAEL005478 (Aedes aegypti), ACEP18372 (Atta cephlotes), Aqu1.217412 (Amphimedon queenslandica), BGIBMGA009014 (Bombyx mori), ENSG00000065615 (Homo sapiens), ENSMUSG00000032872 (Mus musculus), FBgn0034442 (Drosophila melanogaster), GB18586 (Apis mellifera), GB53681 (Apis mellifera), SINV22741 (Solenopsis invicta), TC005424 (Tribolium castaneum), WBGene00013123 (Caenorhabditis elegans)	metabolic process (GO:0008152), catalytic activity (GO:0003824), binding (GO:0005488), biological_process (GO:0008150), single-organism metabolic process (GO:0044710), heterocyclic compound binding (GO:1901363), single-organism process (GO:0044699), organic cyclic compound binding (GO:0097159), tetrapyrrole binding (GO:0046906), oxidation-reduction process (GO:0055114), molecular_function (GO:000…	Cytochrome b5-like Heme/Steroid binding domain (PF00173.23), Oxidoreductase NAD-binding domain (PF00175.16), Oxidoreductase FAD-binding domain (PF00970.19)
protein split ends-like	LOC100123328	XM_008214414.1	-2.00746	1.46158	-2.99134	-2.25179	-0.434721	-2.35201	21.2581	4.01405e-06	0.00284446	0.241564	1.91101	0.216107	1.11448e-122	7.10074e-60	1.84386e-05	4.25957e-66	554.84	266.346	18.3441	294.898	1.84386e-05	0.000257827	NC_015868.2	11418591	11432149	-	protein split ends-like (LOC100123328), transcript variant X2, mRNA	LOC100123328		AAEL009430 (Aedes aegypti), ACEP13586 (Atta cephlotes), Aqu1.230129 (Amphimedon queenslandica), BGIBMGA009003 (Bombyx mori), ENSG00000065526 (Homo sapiens), ENSMUSG00000040761 (Mus musculus), FBgn0016977 (Drosophila melanogaster), GB30197 (Apis mellifera), GB47009 (Apis mellifera), SINV23621 (Solenopsis invicta), TC006356 (Tribolium castaneum), WBGene00008549 (Caenorhabditis elegans)	post-embryonic organ development (GO:0048569), single organism signaling (GO:0044700), morphogenesis of a polarized epithelium (GO:0001738), chaeta morphogenesis (GO:0008407), imaginal disc-derived appendage morphogenesis (GO:0035114), cell surface receptor signaling pathway (GO:0007166), segmentation (GO:0035282), cellular component morphogenesis (GO:0032989), hair cell differentiation (GO:00353…	SPOC domain (PF07744.8)
small subunit processome component 20 homolog	LOC100122027	XM_008212760.1	-1.87636	0.939929	-2.73898	-0.972448	-0.833552	-2.96047	68.7881	1.0963e-16	6.21495e-13	0.300861	2.58199	0.159209	1.93919e-100	3.32123e-16	1.93628e-13	1.25217e-108	452.621	66.6027	54.0684	490.258	1.93628e-13	7.82981e-12	NC_015867.2	15010439	15020627	-	small subunit processome component 20 homolog (LOC100122027), transcript variant X2, mRNA	Small subunit processome component 20	small subunit processome component 20 homolog	AAEL012147 (Aedes aegypti), ACEP27658 (Atta cephlotes), Aqu1.203378 (Amphimedon queenslandica), Aqu1.228803 (Amphimedon queenslandica), BGIBMGA006999 (Bombyx mori), ENSG00000120800 (Homo sapiens), ENSMUSG00000004356 (Mus musculus), FBgn0034734 (Drosophila melanogaster), GB18448 (Apis mellifera), GB48105 (Apis mellifera), SINV22446 (Solenopsis invicta), TC002360 (Tribolium castaneum), WBGene000070…	cellular component biogenesis (GO:0044085), cellular metabolic process (GO:0044237), metabolic process (GO:0008152), biological_process (GO:0008150), RNA processing (GO:0006396), single-organism cellular process (GO:0044763), cellular macromolecule metabolic process (GO:0044260), single-multicellular organism process (GO:0044707), intracellular part (GO:0044424), heterocycle metabolic process (GO…	Down-regulated in metastasis (PF07539.7)
cap-specific mRNA (nucleoside-2'-O-)-methyltransferase 2	LOC103315388	XM_008203871.1	-1.81731	1.48374	-2.40143	-2.43056	-2.29053	-0.146721	19.8375	8.4311e-06	0.00531066	0.642389	10.778	0.0167599	3.74798e-76	1.21997e-69	3.60925e-62	0.225203	341.061	311.161	276.871	1.4709	0.225203	0.595564	NW_001815237.1	65758	68499	+	cap-specific mRNA (nucleoside-2'-O-)-methyltransferase 2 (LOC103315388), transcript variant X1, mRNA	LOC103315388				FtsJ-like methyltransferase (PF01728.14)
mitochondrial 2-oxoglutarate/malate carrier protein-like	LOC100121662	XM_008219522.1	-1.41949	2.73371	-0.210034	-2.28211	-1.64274	-1.54306	13.9422	0.000188514	0.0604916	0.6402	10.6759	0.0170897	0.00237549	2.3231e-158	3.88375e-92	2.7335e-58	9.2341	718.899	414.479	259.072	0.00237549	0.018398	NC_015868.2	19399851	19402319	-	mitochondrial 2-oxoglutarate/malate carrier protein-like (LOC100121662), transcript variant X2, mRNA	Mitochondrial 2-oxoglutarate/malate carrier protein	mitochondrial 2-oxoglutarate/malate carrier protein-like	AAEL017395 (Aedes aegypti), ACEP12193 (Atta cephlotes), Aqu1.221735 (Amphimedon queenslandica), BGIBMGA009057 (Bombyx mori), ENSG00000108528 (Homo sapiens), ENSMUSG00000014606 (Mus musculus), FBgn0039674 (Drosophila melanogaster), GB10141 (Apis mellifera), GB54717 (Apis mellifera), SINV22544 (Solenopsis invicta), TC006414 (Tribolium castaneum), WBGene00015186 (Caenorhabditis elegans)	cytoplasm (GO:0005737), non-membrane-bounded organelle (GO:0043228), substrate-specific transmembrane transporter activity (GO:0022891), alpha-ketoglutarate transport (GO:0015742), mitochondrial inner membrane (GO:0005743), biological_process (GO:0008150), ion transmembrane transporter activity (GO:0015075), single-organism cellular process (GO:0044763), anion:anion antiporter activity (GO:001530…	Mitochondrial carrier protein (PF00153.22)
G2/M phase-specific E3 ubiquitin-protein ligase	LOC100115982	XM_008205146.1	-1.36487	1.35863	-2.44221	-0.381886	-0.406186	-2.2292	5.74296	0.0165549	0.992574	0.174456	1.26794	0.303167	8.54322e-79	0.00137845	0.000393635	1.56672e-59	353.194	10.2344	12.5622	264.769	0.00137845	0.0116043	NC_015869.2	23202427	23211327	-	probable GPI-anchored adhesin-like protein PGA55 (LOC100115982), transcript variant X2, mRNA	G2/M phase-specific E3 ubiquitin-protein ligase		AAEL001093 (Aedes aegypti), AAEL008914 (Aedes aegypti), AAEL011124 (Aedes aegypti), ACEP18043 (Atta cephlotes), BGIBMGA001789 (Bombyx mori), ENSG00000092140 (Homo sapiens), ENSMUSG00000035293 (Mus musculus), FBgn0005683 (Drosophila melanogaster), FBgn0031091 (Drosophila melanogaster), GB19904 (Apis mellifera), GB47632 (Apis mellifera), SINV18392 (Solenopsis invicta)	regulation of cell death (GO:0010941), reproductive process (GO:0022414), chordate embryonic development (GO:0043009), male germ-line sex determination (GO:0019100), cellular metabolic process (GO:0044237), non-membrane-bounded organelle (GO:0043228), metabolic process (GO:0008152), embryo development (GO:0009790), biological_process (GO:0008150), small conjugating protein transferase activity (G…	PHD-like zinc-binding domain (PF13771.1)
60 kDa heat shock protein, mitochondrial-like	LOC100114031	XM_001599995.3	-1.36391	1.01028	-0.519992	-1.46796	-2.1714	-1.29627	16.5015	4.86103e-05	0.0223437	0.695388	13.6972	0.0100767	2.33118e-07	8.62801e-29	4.09484e-56	2.8916e-24	26.737	123.953	249.093	103.292	2.33118e-07	4.66746e-06	NW_001820471.1	228882	232348	-	60 kDa heat shock protein, mitochondrial-like (LOC100114031), transcript variant X1, mRNA	60 kDa heat shock protein. mitochondrial. putative	60 kDa heat shock protein, mitochondrial-like	AAEL011584 (Aedes aegypti), ACEP19776 (Atta cephlotes), Aqu1.205528 (Amphimedon queenslandica), Aqu1.222104 (Amphimedon queenslandica), BGIBMGA007349 (Bombyx mori), ENSG00000144381 (Homo sapiens), ENSMUSG00000025980 (Mus musculus), FBgn0011244 (Drosophila melanogaster), FBgn0015245 (Drosophila melanogaster), FBgn0031728 (Drosophila melanogaster), FBgn0032525 (Drosophila melanogaster), GB18969 (Ap…	nucleoside metabolic process (GO:0009116), reproductive process (GO:0022414), cytoplasm (GO:0005737), cellular metabolic process (GO:0044237), protein transport (GO:0015031), non-membrane-bounded organelle (GO:0043228), metabolic process (GO:0008152), 'de novo' protein folding (GO:0006458), intracellular (GO:0005622), spermatid development (GO:0007286), purine nucleotide catabolic process (GO:000…	TCP-1/cpn60 chaperonin family (PF00118.19)
sodium- and chloride-dependent GABA transporter ine	LOC100115303	XM_008210619.1	-1.3539	1.41695	-1.32828	-2.91478	-0.336051	-0.836511	8.67758	0.00322149	0.402389	0.1716	1.24287	0.30757	2.00195e-34	5.00105e-103	0.000620527	1.31389e-13	149.714	464.516	11.7134	54.8305	0.000620527	0.00587525	NC_015867.2	11503786	11524500	+	sodium- and chloride-dependent GABA transporter ine (LOC100115303), transcript variant X3, mRNA	sodium- and chloride-dependent GABA transporter ine	sodium- and chloride-dependent GABA transporter ine-like	AAEL006412 (Aedes aegypti), ACEP27441 (Atta cephlotes), Aqu1.218938 (Amphimedon queenslandica), BGIBMGA006857 (Bombyx mori), FBgn0011603 (Drosophila melanogaster), GB18205 (Apis mellifera), GB46300 (Apis mellifera), SINV21740 (Solenopsis invicta), TC010681 (Tribolium castaneum)	single organism signaling (GO:0044700), membrane (GO:0016020), solute:cation symporter activity (GO:0015294), cellular developmental process (GO:0048869), single-organism process (GO:0044699), neurogenesis (GO:0022008), monovalent inorganic cation transmembrane transporter activity (GO:0015077), cell (GO:0005623), signal transducer activity (GO:0004871), neurological system process (GO:0050877), …	Sodium:neurotransmitter symporter family (PF00209.13)
F-box protein 11	LOC100115478	XR_512626.1	-1.23225	2.07895	-2.6214	-0.597219	-0.358274	-1.35209	4.15335	0.0415524	1	0.118825	0.809092	0.403043	2.49754e-91	1.89153e-09	3.31675e-05	9.24791e-36	410.765	36.0823	17.2271	155.824	3.31675e-05	0.00043461	NC_015870.2	140089	150368	-	F-box protein 11 (LOC100115478), transcript variant X2, misc_RNA	f-box only protein 11. putative			cellular component biogenesis (GO:0044085), ribonucleoprotein complex biogenesis (GO:0022613), ribonucleoprotein complex assembly (GO:0022618), cytoplasm (GO:0005737), single-organism process (GO:0044699), cell (GO:0005623), negative regulation of RNA metabolic process (GO:0051253), cellular metabolic process (GO:0044237), regulation of RNA biosynthetic process (GO:2001141), metabolic process (GO…	Right handed beta helix region (PF13229.1), Putative zinc finger in N-recognin (UBR box) (PF02207.15), F-box-like (PF12937.2)
lisH domain and HEAT repeat-containing protein KIAA1468 homolog	LOC100120301	XM_008213739.1	-1.18774	1.34096	-1.4876	-0.278979	-2.09707	-0.887308	5.95811	0.0146497	0.936645	0.675341	12.4809	0.0123253	7.92324e-36	0.01718	1.39823e-52	8.10613e-13	156.132	5.6779	232.888	51.2563	0.01718	0.0932546	NW_001819348.1	441721	448050	-	lisH domain and HEAT repeat-containing protein KIAA1468 homolog (LOC100120301), transcript variant X1, mRNA	LisH domain and HEAT repeat-containing protein KIAA1468	uncharacterized LOC100120301	ACEP24125 (Atta cephlotes), Aqu1.225489 (Amphimedon queenslandica), BGIBMGA011657 (Bombyx mori), ENSG00000134444 (Homo sapiens), ENSMUSG00000026319 (Mus musculus), GB12520 (Apis mellifera), GB44293 (Apis mellifera), SINV17523 (Solenopsis invicta), TC003006 (Tribolium castaneum)	binding (GO:0005488), molecular_function (GO:0003674), protein binding (GO:0005515)
DNA topoisomerase 2	LOC100117297	XM_008208620.1	-1.14919	1.06514	-0.00876251	-2.44424	-2.11531	-0.0284487	3.76866	0.0522215	1	0.732015	16.3893	0.00673856	0.645607	1.94229e-70	1.97291e-53	0.984207	0.211483	314.824	236.788	0.000391861	0.984207	1	NC_015871.2	3468999	3477274	+	DNA topoisomerase 2 (LOC100117297), transcript variant X5, mRNA	DNA topoisomerase 2	DNA topoisomerase 2-like	AAEL012584 (Aedes aegypti), AAEL018244 (Aedes aegypti), ACEP11747 (Atta cephlotes), Aqu1.218091 (Amphimedon queenslandica), BGIBMGA011615 (Bombyx mori), ENSG00000077097 (Homo sapiens), FBgn0003732 (Drosophila melanogaster), GB11911 (Apis mellifera), GB50635 (Apis mellifera), SINV13620 (Solenopsis invicta), TC003811 (Tribolium castaneum), WBGene00010785 (Caenorhabditis elegans), WBGene00021604 (Ca…	retina morphogenesis in camera-type eye (GO:0060042), positive regulation of biosynthetic process (GO:0009891), neural retina development (GO:0003407), cellular metabolic process (GO:0044237), regulation of cell cycle process (GO:0010564), DNA secondary structure binding (GO:0000217), non-membrane-bounded organelle (GO:0043228), metabolic process (GO:0008152), regulation of mitotic cell cycle pha…	Histidine kinase-, DNA gyrase B-, and HSP90-like ATPase (PF02518.21), Toprim domain (PF01751.17), DNA gyrase B (PF00204.20), DNA gyrase/topoisomerase IV, subunit A (PF00521.15)
aspartylglucosaminidase	LOC100119424	XM_008213772.1	-1.13161	1.59935	-1.91367	-1.04668	-0.863802	-0.70228	8.35344	0.00384957	0.429974	0.125913	0.864307	0.38841	1.0731e-49	7.84846e-18	3.68825e-21	1.19381e-12	219.66	73.9907	89.1347	50.4964	1.19381e-12	4.51672e-11	NC_015867.2	22885474	22887940	-	aspartylglucosaminidase (LOC100119424), transcript variant X2, mRNA	N	aspartylglucosaminidase	AAEL009406 (Aedes aegypti), ACEP14518 (Atta cephlotes), ACEP23088 (Atta cephalotes), Aqu1.218618 (Amphimedon queenslandica), BGIBMGA000866 (Bombyx mori), ENSG00000038002 (Homo sapiens), ENSMUSG00000031521 (Mus musculus), FBgn0033431 (Drosophila melanogaster), FBgn0034427 (Drosophila melanogaster), FBgn0034665 (Drosophila melanogaster), GB20000 (Apis mellifera), GB43890 (Apis mellifera), SINV24414…	protein deglycosylation (GO:0006517), cytoplasm (GO:0005737), cellular protein metabolic process (GO:0044267), intracellular part (GO:0044424), hydrolase activity (GO:0016787), cell (GO:0005623), cellular metabolic process (GO:0044237), organic substance metabolic process (GO:0071704), metabolic process (GO:0008152), cell part (GO:0044464), intracellular (GO:0005622), catalytic activity (GO:00038…	Asparaginase (PF01112.13)
putative gamma-glutamylcyclotransferase CG2811	LOC100122076	XM_008213266.1	-1.04881	0.658193	-0.844071	-0.944062	-1.75229	-0.65483	12.2924	0.000454804	0.112099	0.671416	12.2602	0.0128037	2.62547e-13	1.32464e-15	2.30904e-38	3.74205e-10	53.4702	63.8766	167.737	39.243	3.74205e-10	1.1037e-08	NC_015870.2	3467008	3468462	+	putative gamma-glutamylcyclotransferase CG2811 (LOC100122076), transcript variant X2, mRNA	Gamma-glutamylcyclotransferase CG2811	putative gamma-glutamylcyclotransferase CG2811-like	ACEP21341 (Atta cephlotes), Aqu1.204084 (Amphimedon queenslandica), Aqu1.204390 (Amphimedon queenslandica), Aqu1.209882 (Amphimedon queenslandica), Aqu1.224043 (Amphimedon queenslandica), BGIBMGA003236 (Bombyx mori), ENSG00000134864 (Homo sapiens), ENSMUSG00000041625 (Mus musculus), FBgn0035082 (Drosophila melanogaster), FBgn0035083 (Drosophila melanogaster), GB14034 (Apis mellifera), GB48250 (Ap…	biological_process (GO:0008150), circulatory system development (GO:0072359), single-multicellular organism process (GO:0044707), single-organism process (GO:0044699), cellular_component (GO:0005575), structural molecule activity (GO:0005198), structural constituent of muscle (GO:0008307), heart development (GO:0007507), multicellular organismal process (GO:0032501), organ development (GO:0048513…	AIG2-like family (PF06094.7)
AT-rich interactive domain-containing protein 2	LOC100121989	XM_008218909.1	-1.04227	2.34145	-0.109436	-1.23176	-2.7617	-0.0661733	2.51879	0.112497	1	0.683036	12.9296	0.0114244	0.066971	2.03034e-49	1.19575e-91	0.690946	3.35574	218.39	412.235	0.158063	0.690946	0.999064	NC_015867.2	9585915	9618943	+	AT-rich interactive domain-containing protein 2 (LOC100121989), transcript variant X4, mRNA	AT-rich interactive domain-containing protein		AAEL001361 (Aedes aegypti), ACEP25962 (Atta cephlotes), Aqu1.219246 (Amphimedon queenslandica), BGIBMGA009297 (Bombyx mori), ENSG00000189079 (Homo sapiens), ENSMUSG00000033237 (Mus musculus), FBgn0042085 (Drosophila melanogaster), GB19258 (Apis mellifera), GB42360 (Apis mellifera), SINV17530 (Solenopsis invicta), TC007520 (Tribolium castaneum), WBGene00007433 (Caenorhabditis elegans)	imaginal disc-derived appendage morphogenesis (GO:0035114), negative regulation of ERBB signaling pathway (GO:1901185), posttranscriptional regulation of gene expression (GO:0010608), positive regulation of biosynthetic process (GO:0009891), non-membrane-bounded organelle (GO:0043228), biological_process (GO:0008150), positive regulation of gene expression, epigenetic (GO:0045815), DNA binding (G…	ARID/BRIGHT DNA binding domain (PF01388.16)
solute carrier family 12 member 4	LOC100116848	XM_008210249.1	-1.0308	2.54743	-0.70634	-1.72372	-0.239675	-1.45347	7.69866	0.00552617	0.525048	0.249771	1.99755	0.207273	4.10368e-25	5.47131e-52	0.00528906	3.32982e-55	107.161	230.171	7.77785	244.918	0.00528906	0.03597	NW_001817348.1	1035333	1174200	-	solute carrier family 12 member 4 (LOC100116848), transcript variant X2, mRNA	solute carrier family 12 member 6. putative	solute carrier family 12 member 7-like	AAEL011792 (Aedes aegypti), AAEL012333 (Aedes aegypti), AAEL012334 (Aedes aegypti), ACEP18139 (Atta cephalotes), ACEP18142 (Atta cephlotes), Aqu1.225555 (Amphimedon queenslandica), Aqu1.225556 (Amphimedon queenslandica), BGIBMGA003629 (Bombyx mori), BGIBMGA003630 (Bombyx mori), ENSG00000140199 (Homo sapiens), ENSMUSG00000027130 (Mus musculus), FBgn0261794 (Drosophila melanogaster), GB17335 (Apis …	cation:chloride symporter activity (GO:0015377), substrate-specific transmembrane transporter activity (GO:0022891), behavior (GO:0007610), response to external stimulus (GO:0009605), biological_process (GO:0008150), single-organism transport (GO:0044765), ion transmembrane transporter activity (GO:0015075), symporter activity (GO:0015293), single-organism cellular process (GO:0044763), carboxyli…	Amino acid permease (PF00324.16)
uncharacterised protein (LOC100120958)	LOC100120958	XM_008211884.1	-1.02259	1.6719	-0.725473	-0.756659	-1.00977	-1.59847	7.5734	0.00592359	0.545025	0.489319	5.74901	0.0534615	6.258e-16	5.46053e-10	1.99813e-16	3.91977e-45	65.3541	38.5053	67.6045	198.747	5.46053e-10	1.57114e-08	NW_001818015.1	1187107	1205267	-	microtubule-associated protein futsch (LOC100120958), transcript variant X4, mRNA	Elongation factor 1-gamma		AAEL011288 (Aedes aegypti), ACEP26560 (Atta cephlotes), Aqu1.224575 (Amphimedon queenslandica), BGIBMGA008302 (Bombyx mori), ENSG00000254772 (Homo sapiens), ENSMUSG00000071644 (Mus musculus), FBgn0029176 (Drosophila melanogaster), GB18764 (Apis mellifera), GB45286 (Apis mellifera), SINV10377 (Solenopsis invicta), TC007229 (Tribolium castaneum), WBGene00008920 (Caenorhabditis elegans)	gland development (GO:0048732), cytoplasm (GO:0005737), cellular metabolic process (GO:0044237), non-membrane-bounded organelle (GO:0043228), metabolic process (GO:0008152), biological_process (GO:0008150), single-organism cellular process (GO:0044763), translation factor activity, nucleic acid binding (GO:0008135), cellular macromolecule metabolic process (GO:0044260), single-multicellular organ…
protein argonaute-2-like	LOC100123519	XM_008216662.1	1.06264	0.979923	1.03204	0.623035	1.57757	1.01791	15.6702	7.54048e-05	0.0312783	0.315474	2.76519	0.147395	1.03411e-17	1.45597e-09	9.30545e-33	1.27732e-17	73.4463	36.5924	142.088	73.0294	1.45597e-09	3.96072e-08	NW_001820749.1	3681062	3687122	-	protein argonaute-2-like (LOC100123519), transcript variant X3, mRNA	argonaute-2 protein	protein argonaute-2-like	AAEL017251 (Aedes aegypti), ACEP12224 (Atta cephlotes), Aqu1.228369 (Amphimedon queenslandica), BGIBMGA010406 (Bombyx mori), FBgn0087035 (Drosophila melanogaster), GB15464 (Apis mellifera), GB50955 (Apis mellifera), SINV22019 (Solenopsis invicta), TC011525 (Tribolium castaneum), TC013762 (Tribolium castaneum), WBGene00004094 (Caenorhabditis elegans), WBGene00004323 (Caenorhabditis elegans), WBGen…	RNA transport (GO:0050658), cellular component biogenesis (GO:0044085), gland development (GO:0048732), reproductive process (GO:0022414), segmentation (GO:0035282), posttranscriptional regulation of gene expression (GO:0010608), cytoplasm (GO:0005737), defense response to other organism (GO:0098542), cellular metabolic process (GO:0044237), response to biotic stimulus (GO:0009607), nuclear migra…	PAZ domain (PF02170.17), Piwi domain (PF02171.12), Domain of unknown function (DUF1785) (PF08699.5)
paired box protein Pax-6	LOC100118963	XM_001602773.3	1.07018	0.879625	0.908813	0.968591	0.213639	2.1897	14.5505	0.000136454	0.0464134	0.0767968	0.499111	0.506385	4.73055e-15	3.12711e-17	0.00189133	2.44083e-61	61.3696	71.2626	9.65212	273.062	0.00189133	0.0151767	NW_001819681.1	228024	269335	+	paired box protein Pax-6 (LOC100118963), transcript variant X2, mRNA	Paired box protein Pax-6	twin of eyeless	AAEL002321 (Aedes aegypti), ACEP24464 (Atta cephlotes), Aqu1.224875 (Amphimedon queenslandica), BGIBMGA009432 (Bombyx mori), ENSG00000007372 (Homo sapiens), ENSMUSG00000027168 (Mus musculus), FBgn0019650 (Drosophila melanogaster), GB11714 (Apis mellifera), GB41504 (Apis mellifera), TC007409 (Tribolium castaneum), WBGene00006870 (Caenorhabditis elegans)	RNA polymerase II distal enhancer sequence-specific DNA binding transcription factor activity (GO:0003705), positive regulation of biosynthetic process (GO:0009891), cellular metabolic process (GO:0044237), metabolic process (GO:0008152), biological_process (GO:0008150), DNA binding (GO:0003677), regulation of primary metabolic process (GO:0080090), cellular macromolecule metabolic process (GO:00…	'Paired box' domain (PF00292.13), Homeobox domain (PF00046.24)
ectonucleoside triphosphate diphosphohydrolase 5	LOC100678150	XM_008211788.1	1.08691	3.34791	1.02894	0.422781	1.59013	1.30577	15.1556	9.90063e-05	0.0358255	0.582791	8.3813	0.0275117	3.93065e-30	2.37848e-10	4.93918e-119	4.40687e-79	130.083	40.1281	538.078	354.514	2.37848e-10	7.16941e-09	NW_001818015.1	572547	580359	+	ectonucleoside triphosphate diphosphohydrolase 5 (LOC100678150), transcript variant X2, mRNA	Ectonucleoside triphosphate diphosphohydrolase 5	ectonucleoside triphosphate diphosphohydrolase 5-like	AAEL005662 (Aedes aegypti), ACEP20652 (Atta cephlotes), Aqu1.201079 (Amphimedon queenslandica), Aqu1.217090 (Amphimedon queenslandica), Aqu1.225251 (Amphimedon queenslandica), BGIBMGA013245 (Bombyx mori), ENSG00000187097 (Homo sapiens), ENSMUSG00000021236 (Mus musculus), FBgn0024947 (Drosophila melanogaster), GB48317 (Apis mellifera), SINV18018 (Solenopsis invicta), TC008016 (Tribolium castaneum)…	cytoplasm (GO:0005737), cell (GO:0005623), nucleoside-diphosphatase activity (GO:0017110), metabolic process (GO:0008152), intracellular (GO:0005622), catalytic activity (GO:0003824), biological_process (GO:0008150), molecular_function (GO:0003674), nucleoside-triphosphatase activity (GO:0017111), cellular_component (GO:0005575), uridine-diphosphatase activity (GO:0045134), intracellular part (GO…	GDA1/CD39 (nucleoside phosphatase) family (PF01150.12)
coiled-coil domain-containing protein 149	LOC100122426	XM_008206132.1	1.08998	1.60111	0.479079	1.37951	2.16401	0.337329	4.01588	0.0450736	1	0.651697	11.2264	0.0154083	0.000208364	3.78638e-35	1.75846e-56	0.00099397	13.7541	153.023	250.777	10.8388	0.00099397	0.00878087	NC_015868.2	24473925	24476254	-	coiled-coil domain-containing protein 149 (LOC100122426), transcript variant X2, mRNA	Coiled-coil domain-containing protein	coiled-coil domain-containing protein 149-B-like	AAEL009892 (Aedes aegypti), AAEL015507 (Aedes aegypti), ACEP16330 (Atta cephlotes), Aqu1.228302 (Amphimedon queenslandica), BGIBMGA011475 (Bombyx mori), ENSG00000181982 (Homo sapiens), ENSMUSG00000045790 (Mus musculus), FBgn0038330 (Drosophila melanogaster), SINV14893 (Solenopsis invicta), WBGene00009258 (Caenorhabditis elegans)		Uncharacterized coiled-coil protein (DUF2353) (PF09789.4)
carbohydrate sulfotransferase 5-like	LOC100116691	XM_001601071.3	1.32226	2.93313	1.7163	1.95393	0.658867	0.959934	16.9354	3.86735e-05	0.018792	0.293109	2.48787	0.165801	4.06095e-71	1.3677e-174	2.30411e-12	2.14347e-35	317.945	793.543	49.2063	154.154	2.30411e-12	8.56006e-11	NW_001814655.1	6792	14374	-	carbohydrate sulfotransferase 5-like (LOC100116691), transcript variant X2, mRNA	Carbohydrate sulfotransferase 5	carbohydrate sulfotransferase 5-like	AAEL011990 (Aedes aegypti), AAEL018230 (Aedes aegypti), ACEP21167 (Atta cephlotes), BGIBMGA004519 (Bombyx mori), BGIBMGA007852 (Bombyx mori), ENSG00000140835 (Homo sapiens), ENSMUSG00000035930 (Mus musculus), FBgn0051637 (Drosophila melanogaster), GB12092 (Apis mellifera), GB54811 (Apis mellifera), SINV11616 (Solenopsis invicta), TC011350 (Tribolium castaneum)	metabolic process (GO:0008152), catalytic activity (GO:0003824), biological_process (GO:0008150), sulfotransferase activity (GO:0008146), transferase activity, transferring sulfur-containing groups (GO:0016782), transferase activity (GO:0016740), molecular_function (GO:0003674)	Sulfotransferase domain (PF00685.22)
putative tyrosine-protein kinase Wsck	LOC100677925	XM_008204866.1	1.32827	1.39498	1.42651	0.395849	1.13133	2.35941	9.75546	0.00178791	0.281546	0.243844	1.93487	0.213618	1.40751e-27	3.70616e-05	1.10304e-19	1.54246e-67	118.414	17.0162	82.4152	301.513	3.70616e-05	0.0004818	NC_015867.2	3714134	3718464	-	putative tyrosine-protein kinase Wsck (LOC100677925), transcript variant X1, mRNA	tyrosine-protein kinase Wsck	putative tyrosine-protein kinase Wsck-like	AAEL011714 (Aedes aegypti), AAEL014844 (Aedes aegypti), ACEP18920 (Atta cephlotes), Aqu1.228070 (Amphimedon queenslandica), BGIBMGA000770 (Bombyx mori), FBgn0046685 (Drosophila melanogaster), GB14700 (Apis mellifera), GB50803 (Apis mellifera), SINV17900 (Solenopsis invicta), TC014160 (Tribolium castaneum), WBGene00012632 (Caenorhabditis elegans), WBGene00017310 (Caenorhabditis elegans)	phosphotransferase activity, alcohol group as acceptor (GO:0016773), peptidyl-tyrosine modification (GO:0018212), protein kinase activity (GO:0004672), cellular metabolic process (GO:0044237), metabolic process (GO:0008152), catalytic activity (GO:0003824), binding (GO:0005488), anion binding (GO:0043168), macromolecule metabolic process (GO:0043170), adenyl ribonucleotide binding (GO:0032559), p…	Fibronectin type III domain (PF00041.16), WSC domain (PF01822.14), Protein tyrosine kinase (PF07714.12)
golgin subfamily A member 2-like	LOC100116846	XM_008209761.1	1.36024	0.992652	1.33136	0.181521	1.91229	2.01581	15.4799	8.33882e-05	0.0322314	0.518203	6.45339	0.04406	3.52656e-25	0.128308	4.05881e-45	6.15411e-50	107.462	2.31286	198.678	220.767	0.128308	0.418596	NC_015868.2	7582034	7586171	+	golgin subfamily A member 2-like (LOC100116846), transcript variant X2, mRNA	Golgin subfamily A member 2	golgin subfamily A member 2-like	AAEL000802 (Aedes aegypti), ACEP10193 (Atta cephlotes), Aqu1.215897 (Amphimedon queenslandica), BGIBMGA006225 (Bombyx mori), ENSG00000167110 (Homo sapiens), ENSMUSG00000002546 (Mus musculus), FBgn0034697 (Drosophila melanogaster), GB16137 (Apis mellifera), GB54570 (Apis mellifera), SINV13772 (Solenopsis invicta), TC014602 (Tribolium castaneum), WBGene00018017 (Caenorhabditis elegans)	cytoplasm (GO:0005737), intracellular (GO:0005622), binding (GO:0005488), biological_process (GO:0008150), Golgi organization (GO:0007030), intracellular part (GO:0044424), Golgi apparatus part (GO:0044431), intracellular organelle part (GO:0044446), Golgi stack (GO:0005795), organelle (GO:0043226), organelle organization (GO:0006996), cytoplasmic part (GO:0044444), endomembrane system organizati…	Putative golgin subfamily A member 2-like protein 5 (PF15070.1)
uncharacterized protein C10orf118 homolog	LOC100121426	XM_008204491.1	1.38967	0.732323	2.5434	2.67337	0.340931	0.000973044	26.6289	2.46531e-07	0.000232931	0.181146	1.32732	0.293112	7.14694e-82	1.80425e-82	4.0315e-05	1	367.327	370.073	16.8565	1.44382e-14	1	1	NC_015867.2	1064493	1067653	+	uncharacterized protein C10orf118 homolog (LOC100121426), transcript variant X2, mRNA	Uncharacterized protein C10orf118	uncharacterized protein C10orf118 homolog	AAEL008071 (Aedes aegypti), ACEP23393 (Atta cephlotes), Aqu1.227214 (Amphimedon queenslandica), BGIBMGA003831 (Bombyx mori), ENSG00000165813 (Homo sapiens), ENSMUSG00000035173 (Mus musculus), FBgn0036614 (Drosophila melanogaster), GB11247 (Apis mellifera), GB49459 (Apis mellifera), TC011457 (Tribolium castaneum), WBGene00013042 (Caenorhabditis elegans)	single organism signaling (GO:0044700), biological_process (GO:0008150), cellular response to stimulus (GO:0051716), single-organism cellular process (GO:0044763), single-organism process (GO:0044699), signal transduction (GO:0007165), signaling (GO:0023052), molecular transducer activity (GO:0060089), regulation of cellular process (GO:0050794), signal transducer activity (GO:0004871), cell comm…
diacylglycerol kinase eta	LOC100120935	XM_008212357.1	1.73558	1.97584	0.198538	3.80834	2.5566	0.378838	15.2815	9.26204e-05	0.0342434	0.475417	5.43767	0.05849	0.109791	6.11778e-225	1.67862e-128	2.74838e-05	2.55723	1025.15	581.605	17.5844	0.109791	0.378893	NW_001818348.1	419567	431640	+	diacylglycerol kinase eta (LOC100120935), transcript variant X4, mRNA	diacylglycerol kinase eta	diacylglycerol kinase eta-like	AAEL002727 (Aedes aegypti), ACEP14618 (Atta cephlotes), Aqu1.227471 (Amphimedon queenslandica), BGIBMGA003299 (Bombyx mori), ENSG00000280873 (Homo sapiens), ENSMUSG00000070738 (Mus musculus), FBgn0085413 (Drosophila melanogaster), GB16108 (Apis mellifera), GB52661 (Apis mellifera), SINV13044 (Solenopsis invicta), TC013915 (Tribolium castaneum), WBGene00006483 (Caenorhabditis elegans)	single organism signaling (GO:0044700), protein kinase C-activating G-protein coupled receptor signaling pathway (GO:0007205), phosphotransferase activity, alcohol group as acceptor (GO:0016773), cell surface receptor signaling pathway (GO:0007166), cellular metabolic process (GO:0044237), metabolic process (GO:0008152), catalytic activity (GO:0003824), binding (GO:0005488), anion binding (GO:004…	Diacylglycerol kinase catalytic domain (PF00781.19), SAM domain (Sterile alpha motif) (PF07647.12), Diacylglycerol kinase accessory domain (PF00609.14), Phorbol esters/diacylglycerol binding domain (C1 domain) (PF00130.17)
dipeptidyl peptidase 9	LOC100123733	XM_008209082.1	1.75646	1.66513	3.22116	0.556082	2.6517	0.596895	17.0815	3.58103e-05	0.0179125	0.311702	2.71715	0.150371	1.86529e-132	8.42287e-13	2.94238e-98	4.27364e-09	599.784	51.181	442.6	34.4949	4.27364e-09	1.09728e-07	NC_015871.2	8003546	8008235	-	dipeptidyl peptidase 9 (LOC100123733), transcript variant X8, mRNA	Dipeptidyl peptidase 9	dipeptidyl peptidase 9-like	AAEL008373 (Aedes aegypti), ACEP22740 (Atta cephlotes), Aqu1.229423 (Amphimedon queenslandica), BGIBMGA008734 (Bombyx mori), BGIBMGA009550 (Bombyx mori), ENSG00000142002 (Homo sapiens), ENSMUSG00000001229 (Mus musculus), FBgn0039240 (Drosophila melanogaster), GB15347 (Apis mellifera), GB53802 (Apis mellifera), SINV22132 (Solenopsis invicta), TC000792 (Tribolium castaneum), WBGene00001056 (Caenorh…	peptidase activity (GO:0008233), metabolic process (GO:0008152), biological_process (GO:0008150), peptidase activity, acting on L-amino acid peptides (GO:0070011), exopeptidase activity (GO:0008238), membrane (GO:0016020), cellular_component (GO:0005575), dipeptidyl-peptidase activity (GO:0008239), organic substance metabolic process (GO:0071704), aminopeptidase activity (GO:0004177), catalytic a…	Dipeptidyl peptidase IV (DPP IV) N-terminal region (PF00930.16), Prolyl oligopeptidase family (PF00326.16)
decaprenyl-diphosphate synthase subunit 1	LOC100118369	XM_008211982.1	1.78626	0.89313	1.6092	1.90342	1.81973	1.81268	54.5761	1.49544e-13	5.08657e-10	0.752248	18.2178	0.00527333	1.28493e-33	1.05416e-42	2.06768e-41	1.86161e-41	146.02	187.615	181.694	181.903	1.28493e-33	1.70543e-31	NW_001818114.1	27516	39346	+	decaprenyl-diphosphate synthase subunit 1 (LOC100118369), transcript variant X3, mRNA	Decaprenyl-diphosphate synthase subunit	decaprenyl-diphosphate synthase subunit 1-like	AAEL002287 (Aedes aegypti), ACEP12251 (Atta cephlotes), Aqu1.210636 (Amphimedon queenslandica), BGIBMGA012564 (Bombyx mori), BGIBMGA012565 (Bombyx mori), ENSG00000148459 (Homo sapiens), ENSMUSG00000026784 (Mus musculus), FBgn0051005 (Drosophila melanogaster), GB12648 (Apis mellifera), GB47896 (Apis mellifera), SINV17162 (Solenopsis invicta), SINV17182 (Solenopsis invicta), TC000408 (Tribolium cas…	regulation of cell death (GO:0010941), cellular lipid metabolic process (GO:0044255), cellular metabolic process (GO:0044237), lipid biosynthetic process (GO:0008610), metabolic process (GO:0008152), biological_process (GO:0008150), cellular response to stimulus (GO:0051716), generation of neurons (GO:0048699), single-organism cellular process (GO:0044763), neuroblast development (GO:0014019), ne…	Polyprenyl synthetase (PF00348.12)
cap-specific mRNA (nucleoside-2'-O-)-methyltransferase 2	LOC103315388	XM_008203872.1	1.8039	0.905031	2.27025	2.48713	2.45685	0.00136208	53.4088	2.70881e-13	7.67811e-10	0.657421	11.5142	0.0146168	9.947e-62	7.10353e-71	1.89485e-72	1	274.851	316.83	324.055	2.70628e-15	1	1	NW_001815237.1	65758	68499	+	cap-specific mRNA (nucleoside-2'-O-)-methyltransferase 2 (LOC103315388), transcript variant X2, mRNA	LOC103315388				FtsJ-like methyltransferase (PF01728.14)
Rho GTPase-activating protein	LOC100118685	XM_001602542.3	1.84388	1.27219	2.58804	1.63164	0.000203762	3.15563	18.0656	2.13421e-05	0.0113427	0.0806164	0.526111	0.495551	3.21734e-80	8.81649e-55	1	1.75328e-127	359.734	242.978	3.30799e-24	576.921	1	1	NC_015869.2	23889285	23898312	+	uncharacterized LOC100118685 (LOC100118685), transcript variant X5, mRNA	Rho GTPase-activating protein	uncharacterized LOC100118685, acyl-CoA Delta(11) desaturase-like	AAEL003203 (Aedes aegypti), AAEL018248 (Aedes aegypti), ACEP14108 (Atta cephlotes), BGIBMGA010121 (Bombyx mori), BGIBMGA010365 (Bombyx mori), ENSG00000099194 (Homo sapiens), ENSMUSG00000037071 (Mus musculus), FBgn0036518 (Drosophila melanogaster), GB11969 (Apis mellifera), SINV20170 (Solenopsis invicta), TC007566 (Tribolium castaneum), WBGene00001399 (Caenorhabditis elegans), WBGene00007064 (Caen…	regulation of cellular process (GO:0050794), single organism signaling (GO:0044700), membrane (GO:0016020), organic acid biosynthetic process (GO:0016053), oxidoreductase activity, acting on paired donors, with oxidation of a pair of donors resulting in the reduction of molecular oxygen to two molecules of water (GO:0016717), intrinsic component of membrane (GO:0031224), single-organism process (…	RhoGAP domain (PF00620.22)
Kv channel-interacting protein 1-like	LOC100121497	XM_008205258.1	2.13776	1.63516	0.124978	3.9481	3.42623	1.05173	20.2157	6.91815e-06	0.00452527	0.502565	6.06187	0.0489806	0.0298798	1.115e-218	1.55961e-155	2.06592e-36	4.7162	996.352	705.899	158.803	0.0298798	0.144127	NW_001814682.1	1877437	1921286	-	Kv channel-interacting protein 1-like (LOC100121497), transcript variant X7, mRNA	Kv channel-interacting protein 2. putative	Kv channel-interacting protein 4-like	ACEP12597 (Atta cephlotes), BGIBMGA011910 (Bombyx mori), ENSG00000182132 (Homo sapiens), ENSMUSG00000053519 (Mus musculus), GB18763 (Apis mellifera), GB50074 (Apis mellifera), SINV15502 (Solenopsis invicta), TC004119 (Tribolium castaneum)	binding (GO:0005488), calcium ion binding (GO:0005509), molecular_function (GO:0003674), cation binding (GO:0043169), ion binding (GO:0043167), metal ion binding (GO:0046872)	EF-hand domain pair (PF13499.1), EF hand (PF00036.27)
